1           **Mechanosensitive pore opening of a prokaryotic voltage-gated sodium channel**

2

3           Peter R. Strege,<sup>1</sup> Luke M. Cowan<sup>1</sup>, Constanza Alcaino,<sup>1</sup> Amelia Mazzone,<sup>1</sup>

4           Christopher A. Ahern,<sup>3</sup> Lorin S. Milescu,<sup>4\*</sup> Gianrico Farrugia,<sup>1,2\*</sup> Arthur Beyder<sup>1,2\*</sup>

5

6           <sup>1</sup>Enteric Neuroscience Program (ENSP), Division of Gastroenterology & Hepatology,

7

Department of Medicine

8

<sup>2</sup>Department of Physiology and Biomedical Engineering

9

Mayo Clinic, Rochester, MN

10

<sup>3</sup>Molecular Physiology and Biophysics, University of Iowa, Iowa City, IA

11

<sup>4</sup>Department of Biology, University of Maryland, College Park, MD

12   Running Head: NaChBac mechanosensitivity

13   \*Corresponding authors:

14   Gianrico Farrugia, M.D., Arthur Beyder, M.D., Ph.D.

15   Mayo Clinic

16   200 First Street SW

17   Rochester, MN 55905

18   Telephone: 507-284-2511. Fax: 507-284-0266

19   Email (ORCID): [farrugia.gianrico@mayo.edu](mailto:farrugia.gianrico@mayo.edu) (0000-0003-3473-5235) and

20   [beyder.arthur@mayo.edu](mailto:beyder.arthur@mayo.edu) (0000-0002-9225-4854)

21

22   Lorin S. Milescu, Ph.D.

23   University of Maryland at College Park

24   College Park, MD 20742

25   Telephone: 716-574-0500

26   Email (ORCID): [LorinSMilescu@gmail.com](mailto:LorinSMilescu@gmail.com) (0000-0002-3177-7010)

27

28

## 29 **ABSTRACT**

30 Voltage-gated ion channels orchestrate electrical activities that drive mechanical functions  
31 in contractile tissues such as the heart and gut. In turn, contractions change membrane tension and  
32 impact ion channels. Voltage-gated ion channels are mechanosensitive, but the mechanisms of  
33 mechanosensitivity remain poorly understood. Here, we leverage the relative simplicity of  
34 NaChBac, a prokaryotic sodium channel from *Bacillus halodurans*, to investigate its  
35 mechanosensitivity. In whole-cell experiments on heterologously transfected HEK293 cells, shear  
36 stress reversibly altered the kinetic properties of NaChBac and increased its maximum current,  
37 comparably to the mechanosensitive eukaryotic sodium channel Nav1.5. In single-channel  
38 experiments, patch suction reversibly increased the open probability of a NaChBac mutant with  
39 inactivation removed. A simple kinetic mechanism featuring a mechanosensitive pore opening  
40 transition explained the overall response to force, whereas an alternative model with  
41 mechanosensitive voltage sensor activation diverged from the data. Structural analysis of  
42 NaChBac identified a large displacement of the hinged intracellular gate, and mutagenesis at the  
43 hinge abolished NaChBac mechanosensitivity, further supporting the proposed mechanism.  
44 Overall, our results suggest that NaChBac responds to force because its pore is intrinsically  
45 mechanosensitive. This mechanism may apply to other voltage-gated ion channels, including  
46 Nav1.5.

## 47 **INTRODUCTION**

48 Electrically excitable tissues with mechanical functions like the heart and gut use voltage-  
49 gated ion channels (VGICs) to generate electrical activity, which drives mechanical activity via  
50 electro-mechanical coupling<sup>1</sup>. Conversely, mechanical movements change membrane tension and  
51 impact electrical function in a process called mechano-electrical feedback<sup>2</sup>, which relies on

52 specialized mechanically-gated ion channels, such as TREK<sup>3</sup> and Piezo<sup>4</sup>. However, studies dating  
53 back nearly 40 years suggest that VGICs are also mechanosensitive and thus may directly  
54 contribute to mechano-electrical feedback<sup>5-9</sup>. Indeed, most VGIC families display  
55 mechanosensitivity, including sodium (Nav)<sup>10</sup>, potassium (Kv)<sup>11</sup>, calcium (Cav)<sup>12</sup>, proton (Hv)<sup>13</sup>,  
56 and cyclic nucleotide-gated (HCN)<sup>14</sup> channels.

57 Mechano-electrical feedback via VGICs can play a distinct physiological role. Unlike the  
58 specialized mechano-gated channels whose activation is generally voltage-insensitive,  
59 mechanosensitive VGICs create a “voltage-informed” mechano-electrical feedback<sup>7,15</sup>. Perhaps  
60 the best example is the voltage-gated sodium channel Nav1.5, responsible for the upstroke of  
61 cardiac action potentials<sup>16</sup>. Given the heart’s role as a pump, Nav1.5 is a natural target for  
62 mechanosensitivity investigations, and several studies showed that macroscopic Nav1.5 currents  
63 are mechanosensitive<sup>10,17</sup>. Interestingly, disease-associated Nav1.5 mutations (channelopathies)  
64 can affect mechanosensitivity<sup>18-20</sup>. Further, lipid-permeable anesthetics and amphipathic drugs  
65 such as ranolazine that target Nav1.5 inhibit its mechanosensitivity, often with little effect on its  
66 voltage-dependent gating<sup>21,22</sup>. Despite this abundant phenomenological evidence, it is unclear  
67 whether mechanosensitivity is intrinsic to the channel or emerges through interactions with other  
68 factors, and the mechanism of mechanosensitivity in Nav channels remains unknown.

69 Nav channels operate through a complex gating mechanism, where the voltage-dependent  
70 movement of the four voltage sensors can trigger a voltage-independent physical opening of the  
71 intracellular gate in the pore, immediately followed by a fast and thorough inactivation<sup>23</sup>. Whether  
72 applied by fluid shear stress or membrane stretch, mechanical force alters the overall voltage  
73 sensitivity of macroscopic Nav currents<sup>8,10,17</sup>, but we do not know how each gating transition is  
74 influenced by force. In principle, this information could be extracted by analyzing the response of

75 single-channel events or macroscopic currents to mechanical stimuli, as recently shown for Kv  
76 channels<sup>24</sup>. However, the complexities of eukaryotic Nav channel structure, together with its fast  
77 activation and inactivation kinetics, would make this mechanistic analysis challenging.

78 An alternative strategy is to use bacterial voltage-gated sodium channels, which have  
79 emerged as powerful models for eukaryotic Navs<sup>25</sup>. Like their eukaryotic counterparts, prokaryotic  
80 Navs are strongly voltage-sensitive<sup>26</sup>, have similar pharmacological sensitivities<sup>27,28</sup>, and share  
81 some structural elements despite being homotetramers<sup>25,28,29</sup>. NaChBac from *Bacillus halodurans*  
82 is the first prokaryotic Nav channel discovered<sup>26</sup> and presents significant advantages for  
83 mechanistic studies: at one-fourth the coding sequence length of eukaryotic Navs, NaChBac has  
84 simpler mutagenesis, structural symmetry, slower kinetics, and removable inactivation, which  
85 altogether facilitate detailed mechanistic investigations<sup>27,28</sup>. In this study, we examined the  
86 mechanism of NaChBac mechanosensitivity through a combination of macroscopic and single-  
87 channel recordings, kinetic modeling, structural analysis, and mutagenesis and found that  
88 mechanosensitivity is intrinsic and likely resides with the channel pore.

## 89 RESULTS

90 **Mechanical stimulation of bacterial voltage-gated sodium channels.** We first tested if  
91 prokaryotic sodium channels are mechanically sensitive, as previously shown for eukaryotic  
92 Navs<sup>8,10,17</sup> (Figure 1). In a side-by-side comparison with the eukaryotic Nav1.5, we examined two  
93 prokaryotic channels: the wild-type (WT) NaChBac and a mutant (T220A) NaChBac with  
94 inactivation removed<sup>27,28</sup> (Figure 1A). We expressed each channel in HEK293 cells and assayed  
95 its mechanosensitivity via whole-cell electrophysiology, with fluid shear stress (1.1 dyn/cm<sup>2</sup>)  
96 applied as mechanical stimulation. Under control conditions, the wild-type NaChBac responded  
97 to depolarizing voltage pulses with steep activation followed by complete inactivation, like Nav1.5

98 but with slower kinetics (Figure 1B, Figure 1 Suppl A-D). The T220A mutant activated and stayed  
99 open with minimal inactivation (Figure 1B; Figure 1 Suppl. B).

100 Shear stress increased the whole-cell currents of both prokaryotic channels, comparably to  
101 Nav1.5 (Figure 1B, “control” vs. “shear”; Figure 1 Suppl. B, E;  $I_{Peak}$  in Table 1). Both activation  
102 and inactivation responded to shear stress, as demonstrated by the difference currents ( $I_{Shear} -$   
103  $I_{Control}$ ) from both wild-type NaChBac and Nav1.5 (Figure 1C). Removal of inactivation in  
104 NaChBac T220A allowed us to separate these responses and focus on activation. Shear forces also  
105 increased T220A NaChBac currents, albeit slightly less than wild-type (Figure 1C), suggesting  
106 that mechanical forces act predominantly on the mechanistic steps associated with the channel’s  
107 activation and/or opening. Overall, shear stress increased maximum conductance ( $G_{Max}$ ) by 47%  
108 for WT NaChBac and 34% for T220A NaChBac, compared to 26% for Nav1.5 (Figure 1D,  $G_{Max}$   
109 in Table 1).

110 Although the steady-state conductance curves obtained under shear stress mostly appear as  
111 vertically stretched versions of the control curves, accounting for the higher maximum current,  
112 they exhibit a slight negative shift of the half-activation voltage (Figure 1D;  $V_{1/2a}$  in Table 1). This  
113 effect is more easily visualized when each conductance curve we normalize to its maximum  
114 (Figure 1 Suppl. F). Shear stress also increased the conductance slope ( $\delta V_a$  in Table 1), while the  
115 foot of the activation curve did not change. Interestingly, the inactivation voltage mid-point also  
116 shifts negative (Figure 1 Suppl. G;  $V_{1/2i}$  in Table 1). Kinetically, shear stress accelerates the time  
117 course of both activation (Figure 1 Suppl. C;  $\tau_a$  in Table 1) and inactivation (Figure 1 Suppl. D;  $\tau_i$   
118 in Table 1).

119 **Interactions between electrical and mechanical stimuli.** The whole-cell shear stress  
120 experiments demonstrate that mechanical forces affect NaChBac macroscopic currents, and these

121 results are likely to have mechanistic implications. However, ambiguities inherent to macroscopic  
122 currents limit the information that can be extracted from data about individual state transitions.  
123 Hence, we addressed these ambiguities via single-channel recordings before conducting a  
124 mechanistic analysis to determine how force interacts with voltage to gate the channel. To simplify  
125 experiments and interpretations, we focused on NaChBac T220A, which lacks inactivation<sup>27,28</sup>.  
126 We expressed NaChBac T220A in Piezo1-knockout (P1KO) HEK293 cells, free of  
127 mechanosensitive channel activity<sup>30</sup> (Figure 2A, Fig 2. Suppl. A-F). We assayed  
128 mechanosensitivity via cell-attached patch-clamp electrophysiology, using a high-speed pressure-  
129 clamp<sup>31</sup> to apply controlled suction to patches.

130 The single-channel amplitude of voltage-gated sodium channels is tiny (~1 pA at -80 mV  
131 and ~0.5 pA at -20 mV), and pressure-clamping introduces additional noise and transient artifacts.  
132 Together with rapid kinetics, these limitations have traditionally prevented single-channel studies  
133 on mechanosensitivity in VGICs. After careful mechanical and electrical optimization, despite the  
134 low signal-to-noise ratio typical for sodium channels<sup>32</sup>, and the noise introduced by the pressure  
135 clamp (Figure 2 Suppl. G), we were able to resolve single-channel events across a physiologically  
136 relevant voltage range, and with enough bandwidth (~1 kHz) to capture sufficiently fast kinetics  
137 (Figure 2A).

138 Suction on the membrane patch exerts a mechanical force on the channel<sup>33</sup>. Because  
139 patches have non-zero resting tension<sup>34</sup>, we designed stimulation protocols to test voltage- and  
140 mechano-sensitivity in a pairwise fashion (Figure 2A), enabling us to compare suction-induced  
141 changes to a no-suction baseline for all channels and traces. Within each 400 ms voltage step  
142 from -100 to -20 mV, the suction pressure alternated between 0 and -10, -30, or -50 mmHg. Thus,  
143 we could obtain and compare control and pressure data in the same cell, using test pressures

144 relevant for mechanosensitive channel function<sup>33,35</sup>. As indicated by the current amplitude  
145 histograms (Figure 2B), the single-channel current is less than 0.5 pA at -20 mV, but we could still  
146 separate the closed and open levels. Above -20 mV, the unitary current became too small for  
147 reliable analysis. Using a half-amplitude threshold method, we measured open state occupancy  
148 between -100 and -20 mV (Figure 2C). We cross-checked this approach against fitting all-point  
149 amplitude histograms with sums of two Gaussian distributions, one for each current level (Figure  
150 2B), where the relative weight of the open-level Gaussian indicates the open state occupancy  
151 probability ( $P_o$ ). The two methods produced similar results.

152 Under control conditions (zero applied patch pressure),  $P_o$  was strongly voltage-dependent  
153 (Figure 2A-C), as predicted by the whole-cell activation curve (Figure 1D).  $P_o$  was nominally zero  
154 at -80 mV and below, and  $P_o$  increased as the voltage became more positive, reaching 0.525 at -20  
155 mV. Relative to whole-cell activation, the  $P_o$  curve is shallower and ~20 mV more positive. This  
156 discrepancy is likely an artifact of a variable and non-zero resting potential, unmeasurable in cell-  
157 attached recordings (averaging sigmoid curves with a scattered and shifted midpoint results in a  
158 shallower and shifted sigmoid).

159 Patch suction altered the voltage-dependent  $P_o$  (Figure 2A-C; Table 2). At extremely  
160 negative voltages (-100 and -80 mV), where the channel is closed under control conditions,  $P_o$   
161 remained zero with suction. However, pressure significantly increased  $P_o$  at more positive  
162 voltages. Responses were dependent on suction strength (Figure 2C, D), but even at high negative  
163 pressures (-30 and -50 mmHg), the induced changes were confined to the voltage activation range  
164 (-80 to -20 mV) (Figure 2C, D). These results agree with the whole-cell experiments, where shear  
165 stress did not move the foot of the activation curve but stretched the curve vertically. As single-  
166 channel data yield the actual  $P_o$  values under different pressures and voltages, we could establish

167 that the increase in whole-cell conductance results from an increase in  $P_o$  and not in single-channel  
168 conductance, which remained constant under pressure (Figure 2A, B).

169 Because some previous studies have shown that shear stress and patch pressure can create  
170 irreversible changes<sup>11,17,36</sup>, we tested specifically for reversibility in our preparations. In whole-  
171 cell experiments, we found that the increase in peak NaChBac T220A current density induced by  
172 shear stress is fully reversible (Figure 3A-B). With single channels, to test the reversibility of  $P_o$   
173 increase by patch pressure, we lengthened the time before pressure application to 2 s, applied -30  
174 mmHg pressure for 500 ms, and compared the pre- and post-pressure  $P_o$  values (Figure 3C, Figure  
175 3 Suppl. A). Pressure increased  $P_o$  throughout the -80 to -20 mV activation range (Figure 3 Suppl.  
176 B), with 20 out of 21 cells responding at -60 mV (Figure 3D-E). Once pressure returned to 0  
177 mmHg,  $P_o$  returned to its baseline value (Figure 3F, Figure 3 Suppl. C-D). As expected, this  
178 change was not instantaneous because the channel must transition back into a different set of state  
179 occupancies, which takes time (Figure 3 Suppl. B).

180 **Mechanical force mainly affects pore opening.** An obvious interpretation of the whole-  
181 cell and single-channel results is that force alone does not open the channel. If it did, we would  
182 see openings at voltages where the channel is typically closed, provided that we applied enough  
183 membrane tension. Instead, we see that force enhances openings (increases  $P_o$ ) that are already  
184 driven by membrane depolarization. A simple interpretation is that force does not create additional  
185 conformational states but modifies the energetics of the existing transitions. If this is true, then  
186 force will interact with at least one mechanistic component: (1) voltage sensor activation, (2) pore  
187 opening, or (3) inactivation. We consider that inactivation is unlikely to play a significant role.  
188 First, NaChBac T220A responds to patch pressure like the wild type, even though the mutant  
189 virtually lacks inactivation (Figure 1B, C). Second, eukaryotic Nav and wild-type NaChBac have



190 similar responses to shear stress (Figure 1B and C), even though they inactivate via different  
191 mechanisms<sup>37</sup>. Thus, the effects of force on inactivation could simply be due to the coupling of  
192 inactivation to activation<sup>38</sup>. For these reasons, we focus here on the NaChBac T220 channels,  
193 which show minimal inactivation.

194       The remaining possibilities are that force interacts with (1) voltage sensors or (2) the pore.  
195 While not necessarily mutually exclusive, the two extreme models corresponding to these  
196 interactions are easier to formulate and discriminate than mixed models. Hence, we examined  
197 specific changes in kinetic properties from the force and compared them against model predictions.  
198 We first formulated a kinetic model (Figure 4A) that encapsulates the homo-tetrameric nature of  
199 NaChBac T220A, its voltage-dependent activation, and its lack of inactivation. We made the rates  
200 along the activation pathway (closed states  $C_1$  to  $C_5$ ) strongly voltage-dependent to agree with the  
201 whole-cell and single-channel activation curves (Figures 1D and 2C). In contrast, we made the  
202 concerted opening transition ( $C_5$  to open state  $O_6$ ) voltage-independent, as previously shown<sup>39</sup> and  
203 based on our observation that the whole-cell activation curve reaches a steady maximum (Figure  
204 1D), which, according to the single-channel data, corresponds to a maximum  $P_O$  of  $\sim 0.6$  (Figure  
205 2C). If the concerted opening were significantly voltage-dependent, the maximum  $P_O$  would  
206 approach unity at strongly depolarizing voltages. The model parameters were manually optimized  
207 to match the experimental data under control conditions (see Methods).

208       ***Mechanosensitive activation:*** The first scenario, where mechanical force interacts only  
209 with the voltage sensors, is captured by a mechanosensitive activation (MSA) model (Figure 4A).  
210 In this case, we expect to see force-induced changes in the mechanosensitive rate constants along  
211 the  $C_1$  to  $C_5$  pathway. Experimentally, we observed increased whole-cell current by shear stress  
212 (Figure 4B), matched by an increase in  $P_O$  when membrane tension is raised via patch suction

213 (Figure 4C). With the MSA model, we can explain this result by ascribing positive tension  
214 sensitivity (i.e., negative pressure sensitivity) to the activation (forward) rates and/or negative  
215 tension sensitivity to the deactivation (backward) rates. A situation where both activation and  
216 deactivation rates have positive or negative tension sensitivities is acceptable, as long as the  
217 forward sensitivities are more positive than the backward ones.

218 The MSA model predicts that the activation curve shifts toward more negative voltages  
219 when tension increases, but its slope and maximum value remain precisely the same (Figure 4B,  
220 MSA). The activation midpoint would change because tension shifts the equilibrium of each  
221 activation step ( $C_1$  to  $C_5$ ) toward  $C_5$  at any given voltage. In contrast, the slope and maximum  $P_O$   
222 would be unchanged by tension because they are determined by the voltage-sensitivity of  
223 activation and by the voltage- and force-independent opening transition ( $C_5$  to  $O_6$ ), respectively.  
224 In other words, extreme tension would push the channel to reside in the  $C_5$  and  $O_6$  states, but the  
225 equilibrium between these two states – and hence maximum  $P_O$  – would remain the same.  
226 However, we did not observe this behavior experimentally. Instead, when membrane tension  
227 increased, both the whole-cell activation curve (Figure 4B) and the  $P_O$  curve (Figure 4C) exhibited  
228 increased steepness and greater maximum value, while the foot of each curve remained  
229 approximately unchanged. The experimental activation data are thus in stark contrast with the  
230 predictions of the MSA model.

231 ***Mechanosensitive opening:*** The alternative scenario, where mechanical force interacts  
232 only with the channel pore, is captured by a mechanosensitive opening (MSO) model (Figure 4A).  
233 In this case, we expect to see force-induced changes in the mechanosensitive  $C_5$  to  $O_6$  rate  
234 constants. With the MSO model, the observed increase in  $P_O$  by tension can be explained by  
235 ascribing positive tension sensitivity to the opening (forward) rate, and/or negative tension

236 sensitivity to the closing (backward) rate, or any combination where the forward sensitivity is more  
237 positive than the backward one.

238         The MSO model predicts that the activation curve reaches a larger value and becomes  
239 steeper when tension increases and shifts slightly toward more negative voltages, with a relatively  
240 unchanged foot (Figure 4B, MSO). The maximum  $P_O$  would change because it is determined by  
241 the tension-dependent pore opening and closing rates, but why would the voltage activation curve  
242 shift and steepen under tension when the tension-dependent rates are voltage-insensitive? To  
243 understand this, we must consider the final two states together,  $C_5$  and  $O_6$ . Their joint occupancy  
244 is determined by the voltage-dependent but tension-independent activation/deactivation rates.  
245 Thus, membrane tension would not alter the voltage-dependent profile of the joint  $C_5$  and  $O_6$   
246 occupancy but would change the occupancy ratio between these two states, favoring the open state.  
247 Therefore, the greater the joint occupancy, the greater the  $P_O$  at any given voltage. The result would  
248 be an asymmetrical shift in the activation curve at the top versus the bottom, increased steepness,  
249 and a greater maximum value. Indeed, the MSO model supports the mechanically induced changes  
250 in the whole-cell and single-channel activation curves (Figure 4B and C, MSO).

251         Having examined the changes in  $P_O$  vs. voltage under different tension values, we  
252 conversely examined  $P_O$  vs. tension under different voltages (Figure 4D). Reversing voltage and  
253 tension as independent variables does not create new information, as we are using the same data  
254 points as in Figure 4C, but it makes it easier to judge the fitness of each model. Thus, the MSA  
255 model predicts a significant shift in the  $P_O$  vs. tension curve when the voltage increases but no  
256 change in the maximum value and the slope of the curve (Figure 4D, MSA). In contrast, the MSO  
257 model predicts a significant change in the maximum value and the slope but only a small shift in  
258 the curve and a slight change in its foot (Figure 4D, MSO). The experimental  $P_O$  data points align

259 well with either the MSA or the MSO model at zero pressure. However, the MSO model becomes  
260 a significantly better match to the data as the pressures increase (Figure 4C).

261 **Mechanical force destabilizes the NaChBac closed state.** The analysis so far clearly  
262 favors the MSO model. However, we used only the steady-state information in the data, and we  
263 do not know if the MSO model can also explain the observed kinetics. The MSO model assumes  
264 tension-dependent opening and closing rates (at least one, if not both), whereas the MSA model  
265 assumes these rates to be tension-independent. If the pore opening transition were tension-  
266 dependent, then the pore opening ( $C_5$  to  $O_6$ ) and/or the closing ( $O_6$  to  $C_5$ ) rate would be affected  
267 by force, which would be reflected in the single-channel closed and open lifetimes. In our simple  
268 NaChBac kinetic model, the open state lifetime distribution has only one component, with the time  
269 constant equal to the inverse of the closing rate constant ( $O_6$  to  $C_5$ ). In contrast, the closed state  
270 lifetime distribution has five components, without an easy way to isolate the opening rate constant.  
271 However, the deactivation rates are likely so small at extremely depolarizing voltages (e.g.,  $\geq -20$   
272 mV) that the channel essentially flickers between the last two states ( $C_5$  and  $O_6$ ). Hence, as an  
273 approximation, the closed lifetime distribution has one component, and its time constant  
274 approaches the inverse of the opening rate constant ( $C_5$  to  $O_6$ ). Consequently, a truncated model  
275 with only the final two states would approximate the channel at  $-20$  mV (Figure 4E).

276 Because NaChBac T220A has some residual inactivation (Figure 1 Suppl. E, J), we used  
277 relatively short (200-500 ms) voltage/pressure stimulation episodes, so many recorded traces  
278 contained no events. To fit the single-channel data with the MIL algorithm<sup>40</sup>, we had to discard  
279 the first and last dwells in each trace because they are likely truncated and cannot be used for  
280 analysis, which means that all the event-less traces were also discarded. Under these conditions,  
281 the remaining data would yield a significantly higher  $P_o$  and bias the estimated rates. To partially

282 compensate, we constrained the model parameters<sup>41,42</sup> to enforce a ratio between the opening and  
283 closing rate constants corresponding to the  $P_o$  measured under control (zero added tension)  
284 conditions. We also constrained the pressure sensitivity parameters since we can reliably estimate  
285 them from the  $P_o$  data, but we verified that we could obtain similar results without this constraint.  
286 Although the single-channel fits are subject to inherent stochasticity (Figure 4E), they clearly show  
287 that, under tension, the closed state lifetime distribution shifts toward shorter dwell times. The  
288 average closed lifetime approaches the bandwidth limit ( $\sim 1$  ms), but the fitting algorithm partially  
289 compensates for the missed events. In contrast, the open state distribution remained virtually  
290 unchanged by tension.

291         The observed shift in the closed state lifetimes further confirms that the channel is better  
292 represented by the MSO model, as the competing MSA model would exhibit no such shift at  
293 saturating voltages. Moreover, it suggests that force destabilizes the closed state as the opening  
294 rate changes with tension. As we now have an idea about the magnitude of opening and closing  
295 rates, we can also examine activation kinetics. In principle, we can extract this information by  
296 fitting the single-channel data recorded at intermediate voltages (e.g.,  $-60$  mV), where the channel  
297 visits all states. However, the changes in voltage and pressure stimuli make these data non-  
298 stationary, and a more straightforward approach is to examine the macroscopic data created by  
299 averaging the single-channel recordings. As shown in Figure 4F, the MSO model captures well  
300 the time course of the average current and gives us an idea about the magnitude of the activation  
301 rates. In all, our modeling of the whole cell and single channel results suggest that the MSO model,  
302 which assigns tension sensitivity to the voltage-insensitive pore opening step, best fits the  
303 experimental data and places the NaChBac mechanosensor within the pore.

304         **Pressure affects the stability of the intracellular gate.** According to the “force-from-

305 lipid” model<sup>43</sup>, ion channels gain mechanosensitivity when their cross-section expands or shrinks  
306 upon a conformational change<sup>44,45</sup>. Based on our kinetic analysis, the site of mechanosensitivity in  
307 NaChBac is most likely the pore opening, the final gating transition (C<sub>5</sub> to O<sub>6</sub> in the MSO model  
308 in Figure 4A). Interestingly, previous structural modeling studies have predicted that when voltage  
309 sensors are suitably activated, mechanical energy is required to open the gate<sup>46</sup>, which implies that  
310 negative membrane tension (i.e., patch suction) would facilitate opening. If our hypothesis were  
311 true, we would predict a change in the cross-section between the final two states in the MSO model:  
312 the activated but still closed C<sub>5</sub> and the open O<sub>6</sub>. To test this hypothesis, we examined the two  
313 existing prokaryotic voltage-gated sodium channel structural models: NavAb, capturing the  
314 channel in the closed conformation<sup>47</sup>, and NavMs, representing the open state<sup>48</sup>.

315 By contrasting closed and open models, we searched for the channel substructures  
316 undergoing the largest movements within the membrane plane and found that the intracellular  
317 portion of the pore-forming S6 segment is displaced laterally around a “gating hinge” (Figure 5A,  
318 B). Interestingly, this type of movement has been previously proposed in functional studies<sup>49-51</sup>  
319 and confirmed by structural experiments,<sup>52</sup> including an example where the intracellular side of a  
320 voltage-gated ion channel pore was found to expand the area of the bilayer’s inner leaflet upon S6  
321 lateral movement<sup>49,53</sup>.

322 According to our structural analysis, the “force-from-lipid” model applies to NaChBac.  
323 Because S6 helices move and open the pore only after voltage sensors activate, it follows that  
324 mechanosensitivity, which is associated with S6 movement, resides with the pore opening (C<sub>5</sub> to  
325 O<sub>6</sub> in the MSO model) and not with the voltage sensor activation (C<sub>1</sub> to C<sub>5</sub> in the MSA model).  
326 This interpretation agrees with the MSO model, with one potential caveat being that NavAb as a  
327 closed channel could represent other closed states along the activation pathway, rather than the

328 fully activated closed conformation ( $C_5$  in the MSO model). As a result, a mechanosensitive  
329 transition could still occur before pore opening. In other words, although the pore opening is likely  
330 mechanosensitive, it might not be the only mechanosensitive transition based solely on these  
331 structural models.

332 If mechanosensitivity were exclusive to pore opening, preventing S6 lateral movement via  
333 mutagenesis would abolish the effects of patch suction on  $P_o$ . However, if voltage sensor activation  
334 were also mechanosensitive, then voltage sensor mutagenesis would only change the response to  
335 suction but not eliminate it. We tested these ideas via site-directed mutagenesis within the S6 hinge  
336 and the voltage sensor, using NaChBac T220A as background. Most mutations we tried within the  
337 pore resulted in non-expressing or non-functional channels, but eventually, we identified I228G in  
338 the S6 hinge region (Figure 5B). Within the voltage sensor, we chose D93A to stabilize the sensor  
339 in the resting position<sup>54</sup> (Figure 5B). We applied the same single-channel experimental paradigms  
340 to directly compare the double mutants (NaChBac T220A plus I228G or D93A) with the T220A  
341 results described above (Figure 5C).

342 The voltage sensor NaChBac T220A+D93A double mutant shifted its voltage sensitivity  
343 relative to T220A (Figure 5D; Figure 5 Suppl. C). However, its mechanosensitivity remained intact  
344 and followed the negative shift of voltage-dependent gating (Figure 5D, E). The pore NaChBac  
345 T220A+I228G double mutant channel exhibits some interesting properties. First, the channel  
346 could gate normally with voltage, like the single mutant controls (Figure 5D). However,  $P_o$  did  
347 not reach zero at -80 mV but remained around 0.1. Second, the effect of membrane tension on  $P_o$   
348 was nearly eliminated (Figure 5E). Thus, at -60 mV, membrane tension increased  $P_o$  by 0.096 for  
349 the NaChBac T220A mutant but only by 0.035 for NaChBac T220A+I228G, corresponding to ~3-  
350 fold difference in effects between the two mutants. At -40 mV, the difference was even more

351 significant (~4-fold): 0.090 with NaChBac T220A and only 0.025 with NaChBac T220A+I228G.  
352 We could explain the small remaining effect of tension on  $P_o$  in the double mutant in two ways:  
353 either cross-section expansion due to a partial displacement of S6 during pore opening or another  
354 weakly mechanosensitive transition in the gating mechanism. The first possibility seems more  
355 plausible because some degree of S6 displacement is probably necessary for channel opening, and  
356 also because NaChBac T220A+D93A maintained a tension sensitivity similar to NaChBac T220A,  
357 even though its voltage sensitivity shifted by more than -30 mV (Figure 5D). Overall, these  
358 mutagenesis results provide experimental evidence that strengthens our conclusion that  
359 mechanical forces interact primarily with the pore opening transition.

## 360 **DISCUSSION**

361 Electrically excitable cells depend on concerted efforts by voltage-gated ion channels  
362 (VGICs) to detect small changes in transmembrane voltage and amplify them to produce a wide  
363 range of action potentials<sup>55</sup>. Some electrical organs, such as the heart, bladder, and gut, function  
364 primarily as mechanical pumps, using excitation-contraction coupling to drive muscle  
365 contractions. Cells in these pumps experience significant recurrent changes in membrane tension  
366 that can potentially affect the activity of membrane proteins, which, in turn, can affect organ  
367 function by a process called mechano-electrical feedback<sup>7,8,15,56</sup>. For VGICs in mechanical  
368 environments, mechanosensitivity may integrate both electrical<sup>57</sup> and mechanical signals into a  
369 single control loop<sup>7</sup>.

370 VGICs are mechanosensitive<sup>24,58-62</sup>, but the mechanisms of their mechanosensitivity  
371 remain poorly understood because of intrinsic structural and functional limitations. We used the  
372 bacterial voltage-gated sodium channel NaChBac as a model because it shares crucial structural  
373 and functional elements<sup>25,26</sup> with voltage-gated sodium channels (Navs). We found that



374 NaChBac<sup>26</sup> is mechanosensitive, and impressively, the mechanosensitive responses of NaChBac  
375 closely resembled those of Nav1.5 (Figure 1), with forces increasing the peak currents and  
376 accelerating the kinetics. These were consistent with previous studies using macroscopic currents  
377 to examine mechanosensitivity in eukaryotic Navs<sup>10,17</sup> and other VGICs<sup>11,63,64</sup>, which further  
378 strengthens NaChBac as a model to study eukaryotic VGICs. In response to physiological levels  
379 of mechanical stimuli traditionally used to stimulate mechanogated ion channel<sup>65</sup>, NaChBac  
380 populations, and single channels substantially increased their activity in a voltage-dependent  
381 manner (Figures 1 and 2). Force produced asymmetric rises in peak voltage-gated currents as the  
382 membrane potential depolarized to activate the channels. It is important to note that forces did not  
383 directly open NaChBac without voltage stimuli (Figure 1 and Figure 2), suggesting that  
384 mechanical force does not create new conformational states but rather impacts a single transition  
385 along the gating pathway. While whole-cell experiments proved informative, single-channel  
386 studies were required to test our hypotheses directly.

387 We removed NaChBac inactivation (NaChBac T220A)<sup>27,28</sup>, which allowed us to zoom in  
388 on the mechanosensitivity of voltage-dependent activation. Using NaChBac T220A along with  
389 technical modifications and paired-stimulus configuration, which controlled for the known resting  
390 elevated mechanical tension in patch bilayers<sup>34,66</sup>, we were able to resolve sub-pA NaChBac events  
391 with mechanical stimulation (Figures 2-5). Physiologically relevant patch suction modified  
392 NaChBac voltage-gating, reversibly increasing NaChBac voltage-dependent open probability ( $P_o$ )  
393 in a dose-dependent fashion. This effect was indeed state-dependent, suggesting that applied forces  
394 have a state-specific effect on the Nav channel, where the added mechanical energy appears to  
395 modify the energy landscape of gating but does not overcome voltage-gating<sup>46,67</sup>.

396 To explain NaChBac mechanosensitivity, we propose the “mechanosensitive opening”  
397 (MSO) model, rather than “mechanosensitive activation (MSA), which features NaChBac pore  
398 opening as one strongly mechanosensitive transition (Figure 4). It is remarkable considering the  
399 MSO model’s simplicity that it could fit both whole-cell and single-channel data. The critical  
400 model discriminator was the force-induced change in the whole-cell voltage-dependent activation  
401 curve: increased maximum response and slope with an unchanged foot. We discriminated the two  
402 models by voltage-induced changes in the single-channel pressure-dependent activation curve.  
403 Finally, the MSO model explained the pressure-dependent changes in the pore opening. As  
404 observed in single-channel data at maximally activating voltages, suction shortened closed state  
405 lifetimes, suggesting that pressure destabilizes the closed state and ruling out non-specific pressure  
406 effects. While the structures responsible for voltage and force sensitivity may be distinct and  
407 function independently, from the kinetic mechanism standpoint, voltage and force sensitivities are  
408 state-dependent and intertwined: voltage acts on states  $C_1$  through  $C_5$ , whereas tension acts on  
409 states  $C_5$  and  $O_6$ . Consequently, channels must first activate by voltage before responding to  
410 tension. While simplified, this model captures the essence of the VGIC function and can apply to  
411 both prokaryotic and eukaryotic sodium channels.

412 Comparing the closed and open bacterial Nav crystal structures shows the most extensive  
413 area changes are in the intracellular gate during the transition from closed to open<sup>48,52</sup>. The bottom  
414 halves of S6 form the intracellular gate, working like hinges on a door latched by non-covalent  
415 interactions. Functional and modeling studies support the *swinging door* model: targeting S6  
416 residues around the pore’s hinge impedes gating<sup>50,51,68</sup>, and pore opening led to a physical  
417 expansion of the inner leaflet, suggesting a palpable area expansion<sup>69</sup>. Consistent with these  
418 studies, electrophysiology and modeling show that S6 in the pore stores mechanical energy of

419 gating<sup>46,70</sup>. Therefore, determining a mechanosensitive site via mutagenesis to the voltage-sensor  
420 or pore domain offers conclusive evidence for the MSO model. We targeted both sites separately  
421 to differentiate between the effects of force on voltage sensors from those on the pore. The S4  
422 positively charged residues that sense voltage are stabilized in the resting state within the lipid  
423 bilayer by counterbalancing acidic (negatively charged) residues<sup>54</sup>. By mutating one of these acidic  
424 residues (D93), we left-shifted the voltage-dependence of activation but otherwise did not change  
425 mechanosensitivity, confirming that voltage sensors do not significantly contribute to  
426 mechanosensitivity (Figure 5). Our functional data suggested that S6, forming a highly conserved  
427 component of the intracellular gate, might influence NaChBac mechanosensitivity. After testing  
428 several dead mutants, we found and mutated a conserved hydrophobic residue I228 in the S6 lining  
429 the channel pore. While I228G did not appreciably affect voltage-gating, it eliminated response to  
430 pressure, demonstrating that the pore is critical for mechanosensitivity (Figure 5). Thus, these  
431 results agree with structural and functional data showing significant in-plane area expansion during  
432 channel gating, support the *swinging door* model of VGIC pore gating, and suggest that force and  
433 voltage collaborate to gate NaChBac.

434         Since broad structural aspects of the intracellular gate appear conserved across VGICs from  
435 prokaryotes to eukaryotes<sup>71,72</sup>, we surmise that VGIC mechanosensitivity may be generalizable. If  
436 mechanosensitivity were deleterious, it would likely not have reached the level of prevalence it  
437 has; nature would have selected for a different gating mechanism without cross-section expansion.  
438 Nevertheless, it is a ubiquitous property observed across many families of VGICs<sup>24,61</sup> and across  
439 each phylum, including unicellular to complex multicellular organisms. Perhaps archaic  
440 prokaryotic ion channels and sodium channels overall have developed maintained

441 mechanosensitivity as their earliest *sense*<sup>73</sup>, and sodium channels maintained it under selective  
442 pressure.

443         How does membrane tension reach the NaChBac pore? In the *force-from-lipid* model,  
444 bilayers transduce mechanical energy directly into channel gating<sup>43,74,75</sup>. For the tensed bilayer to  
445 perform work ( $F \cdot d$ ) on the channel, conformational transitions leading to the open state must  
446 associate with in-plane area expansion during opening and contraction during closing<sup>45</sup>. Bilayers  
447 self-assemble to minimize contact between lipid tails and water molecules. However, despite  
448 minimization of free energy in assembled bilayers, the physical and energetic differences between  
449 phospholipid headgroups and lipid tails produce substantial intrinsic lateral forces<sup>76</sup> reaching 1,000  
450 atm<sup>77</sup>. These lateral forces act upon the protein-lipid interface of ion channels<sup>65,78</sup> and have non-  
451 homogeneous effects on resident proteins through the bilayer thickness: the hydrophobic lipid core  
452 applies compression while phospholipid head groups apply tension (Figure 6). Specialized  
453 mechano-gated ion channels are logical candidates to take advantage of this physical arrangement,  
454 and indeed they leverage forces developed at the protein-lipid interface for their *force-from-lipid*  
455 gating<sup>43,65,78,79</sup>. For VGICs, both voltage sensors<sup>80</sup> and pore-forming structures are bathed in  
456 phospholipids<sup>81</sup>. Therefore, it is reasonable to conclude that lipids could contribute to force  
457 sensing<sup>11,46</sup>, given that lipids are crucial for voltage-dependent gating<sup>80,82</sup> and pore  
458 opening<sup>10,46,74,81</sup>, and lipid permeable compounds frequently alter VGIC mechanosensitivity<sup>21,83</sup>.  
459 Further work is required to determine the effects of lipid-protein interactions on VGIC  
460 mechanosensitivity.

461         VGIC's  $P_o$ -dependent mechanosensitivity has important physiologic implications,  
462 allowing Nav channels to serve as voltage-sensitive mechanosensors. Force can adjust the voltage  
463 set point for Nav channel activation and affect action potential upstroke, regulating excitability<sup>5,6</sup>.

464 Meanwhile, mechanosensitivity in voltage-gated potassium (Kv) channels<sup>11</sup> may serve as a  
465 mechanical brake on neuronal hyperexcitability in a voltage-sensitive fashion<sup>7</sup>. Beyond roles for  
466 VGIC mechanosensitivity in physiology, studies have uncovered patient VGIC mutations with  
467 functional disruptions in mechanosensitivity associated with diseases such as long-QT syndrome<sup>18</sup>  
468 and irritable bowel syndrome (IBS)<sup>20,84</sup>.

469 VGIC mechanosensitivity could be pharmacologically targeted in mechano-pathologies.  
470 Although specific VGIC mechanosensing inhibitors remain undeveloped, recent studies show that  
471 some amphipathic compounds Nav channels are effective blockers of Nav mechanosensitivity,  
472 separate from their local anesthetic mechanism<sup>21,22,83</sup>. Interestingly, the compounds' amphipathic  
473 nature is critical for function<sup>21,83</sup>, implying the channel pore's lipid-protein interface is crucial for  
474 VGIC mechanosensitivity and suggesting the intracellular gate's interaction with lipids may  
475 provide a novel pharmacologic target.

476 To summarize, we show here that the prokaryotic VGIC NaChBac is intrinsically  
477 mechanosensitive, and its mechanosensitivity depends on the channel pore intracellular gate.  
478 These results offer opportunities for future studies to determine roles for Nav channel  
479 mechanosensitivity in physiology and pathophysiology and target Nav mechanosensitivity in  
480 disease.

481

482

## 483 MATERIALS AND METHODS

### 484 Cell culture

485 Human embryonic kidney cells (HEK293; American Type Culture Collection, Manassas,  
486 VA) were cultured in minimum essential medium (MEM, 11095-080) supplemented with 10%  
487 fetal bovine serum (FBS, 10082147) and 1% penicillin-streptomycin (15140-122, Life  
488 Technologies, Co., Grand Island, NY). Regular or Piezo1 knockout (P1KO) HEK293 cells (a kind  
489 gift from Dr. Ardem Patapoutian, Scripps Research Institute<sup>30</sup>) were transfected with DNA  
490 plasmids encoding wild-type Nav1.5 (variant H558/Q1077del) or wild-type or T220A NaChBac,  
491 along with GFP as a reporter, by Lipofectamine 3000 reagent (L3000-008) in OPTI-MEM medium  
492 (31985-070; Life Technologies, Co., Grand Island, NY). Transfected cells were incubated at 37  
493 °C for 24 h (Nav1.5) or 32 °C for 24-48 h (WT or T220A NaChBac). Then, cells were lifted by  
494 trypsin and resuspended in NaCl Ringer's extracellular solution (composition below) before  
495 electrophysiology.

496 Site-directed mutagenesis was performed in the T220A NaChBac background to introduce  
497 an additional mutation, I228G or D93A, by using the QuikChange Lightning Site-Directed  
498 Mutagenesis Kit (Agilent Technologies, Santa Clara, CA). Upon verification of construct integrity  
499 and successful mutagenesis by DNA sequencing, either plasmid was transfected into P1KO cells  
500 for electrophysiology (Table 3, Figure 5).

### 501 Electrophysiology

502 ***Pipette fabrication and data acquisition.*** Pipettes were pulled from KG-12 or 8250 glass  
503 (King Precision Glass, Claremont, CA) for whole-cell or cell-attached patches, respectively, on a  
504 P-97 puller (Sutter Instruments, Novato, CA) and coated with HIPEC R-6101 (Dow Corning,

505 Midland, MI). Data were acquired with an Axopatch 200B amplifier, Digidata 1440A or 1550,  
506 and pClamp 10.6-11.2.1 software (Molecular Devices, Sunnyvale, CA).

507 **Recording solutions.** For whole-cell electrophysiology of WT or T220A NaChBac, the  
508 extracellular solution was NaCl Ringer's, containing (in mM): 150 Na<sup>+</sup>, 5 K<sup>+</sup>, 2.5 Ca<sup>2+</sup>, 160 Cl<sup>-</sup>,  
509 10 HEPES, 5.5 glucose, pH 7.35, 300 mmol/kg. The intracellular solution contained (in mM): 145  
510 Cs<sup>+</sup>, 5 Na<sup>+</sup>, 5 Mg<sup>2+</sup>, 125 CH<sub>3</sub>SO<sub>3</sub><sup>-</sup>, 35 Cl<sup>-</sup>, 10 HEPES, 2 EGTA, pH 7.0, 300 mmol/kg. For whole-  
511 cell electrophysiology of Nav1.5 and cell-attached patch clamp of T220A NaChBac, the bath  
512 (extracellular) solution contained (in mM): 135 Cs<sup>+</sup>, 15 Na<sup>+</sup>, 5 K<sup>+</sup>, 2.5 Ca<sup>2+</sup>, 160 Cl<sup>-</sup>, 10 HEPES,  
513 5.5 glucose, pH 7.35, 300 mmol/kg. The pipette solution for cell-attached patches was NaCl  
514 Ringer's, supplemented with 0.03 mM Gd<sup>3+</sup> to inhibit leak currents.

515 **Whole-cell voltage clamp.** Whole cell Na<sup>+</sup> currents from HEK293 cells heterologously  
516 expressing Nav1.5 (variant H558/Q1077del) or WT or T220A NaChBac were recorded with a  
517 two-pulse protocol that tests channel activation during the first step and channel availability  
518 (steady-state inactivation) during the second step. Cells expressing Nav1.5 were pulsed every 1 s  
519 from the -130-mV holding potential through -10 mV in 5 mV intervals during step 1, then  
520 immediately pulsed to -40 mV for 50 ms during step 2. Nav1.5 data were sampled at 20 kHz and  
521 filtered at 5 kHz. Cells expressing NaChBac were pulsed every 4.75 s from the -120-mV holding  
522 potential through 0 mV in 10 mV intervals during step 1, then immediately pulsed to 0 mV for 50  
523 ms (WT) or -50 mV for 400 ms (T220A) during step 2 (Figure 1 Suppl. A). NaChBac data were  
524 sampled at 2 kHz and filtered at 1kHz.

525 **Cell-attached patch-clamp.** P1KO cells heterologously expressing T220A NaChBac  
526 channels were held at -120 mV. To obtain single-channel events, we recorded thousands of sweeps  
527 in response to a voltage ladder protocol containing five 400 ms-long steps, from -100 mV to -20

528 mV in 20 mV increments, with a 3 s inter-sweep interval. Each voltage step was divided in two  
529 200 ms-long pressure steps, from 0 mmHg to -10, -30, or -50 mmHg. Because the D93A mutant  
530 had open and closed times approximately 2-5 times longer than T220A, D93A experiments were  
531 performed with 4 s-long voltage steps and 2 s-long pressure steps. To test reversibility following  
532 pressure, the duration of each of the five voltage steps was 1 s with a 7.5 s inter-sweep interval,  
533 and pressure was applied for 500 ms (Figure 3 Suppl. A). Capacitance and passive currents were  
534 subtracted with a 1-sweep blank record, averaged from several to dozens of traces from the same  
535 or a subsequent recording in which no channel openings were observed<sup>85</sup>.

536 ***Mechanical stimulation.*** Mechanical stimuli were applied by shear stress to the entire cell,  
537 and by pressure clamp to membrane patches, as previously described<sup>21,22</sup>. For whole-cell  
538 electrophysiology, shear stress was applied as the flow of extracellular solution through the 700-  
539  $\mu$ L elliptical bath chamber, for 60-90 s at 10 mL/min<sup>20,22</sup>. For cell-attached patch-clamp  
540 experiments, a negative pressure of -10 or -30 mmHg was applied by high-speed pressure clamp  
541 (HSPC-1, ALA Scientific Instruments, Farmingdale, NY)<sup>31</sup>. The single-channel data were sampled  
542 at 20 kHz and low-pass filtered on-line at 5 kHz but for analysis were further filtered at 0.5 kHz,  
543 due to a bandwidth limitation imposed by the HSPC (Figure 2 Suppl. G). The pressure clamp was  
544 set to +10 mmHg before the pipette entered the bath, then it was stepped to 0 mmHg after the tip  
545 contacted the cell membrane. Initial pipette resistance was 1-2 M $\Omega$ , and seal resistance was >10  
546 G $\Omega$ .

#### 547 Data analysis

548 Data were analyzed in pClamp version 10.6 or 11.0.3 (Molecular Devices, Sunnyvale, CA),  
549 Excel 2010 (Microsoft, Redmond, WA), and Sigmaplot 12.5 (Systat Software, San Jose, CA). To  
550 estimate whole-cell conductance and voltage-dependent activation, the peak current evoked by



551 voltage step 1 in the protocol described above was fit with a Boltzmann equation,  $I_V =$   
552  $(V - E_{Rev}) \times G_{Max} / \left(1 + e^{\left((V - V_{1/2a}) / \delta V_a\right)}\right)$ , where  $I_V$  is the peak current (pA/pF) at the test voltage  
553  $V$  (mV),  $E_{Rev}$  is the reversal potential (mV),  $G_{Max}$  is maximum conductance (nS),  $V_{1/2a}$  is the half-  
554 activation voltage (mV), and  $\delta V_a$  is the voltage sensitivity of activation (mV). To estimate voltage-  
555 dependent inactivation, the peak current  $I_V$  evoked by voltage step 2 in the protocol was first  
556 normalized as a percentage to its maximum across all sweeps and then was fit with a Boltzmann  
557 equation,  $I_V = 1 / \left(1 + e^{\left((V - V_{1/2i}) / \delta V_i\right)}\right)$ , where  $V_{1/2i}$  is the half-inactivation voltage and  $\delta V_i$  is the  
558 voltage sensitivity of inactivation. For kinetic analysis, whole-cell currents were fit to an  
559 exponential equation,  $I_t = A_1 \times e^{-t/\tau_a} + A_2 \times e^{-t/\tau_i} + C$ , where  $\tau_a$  and  $\tau_i$  are activation and  
560 inactivation time constants (ms), respectively, and  $A_1$ ,  $A_2$ , and  $C$  are constants.

561 To characterize single-channel conductance properties, all-point histograms of T220A  
562 NaChBac single-channel activity were fit with a sum of two Gaussian functions,  $f(x) =$   
563  $A_1 \times \left(e^{-0.5 \times (x - \mu_1)^2 / \sigma_1^2}\right) / (\sigma_1 \times \sqrt{2\pi}) + A_2 \times \left(e^{-0.5 \times (x - \mu_2)^2 / \sigma_2^2}\right) / (\sigma_2 \times \sqrt{2\pi}) + C$ , where  $x$  is current  
564 (pA),  $\mu$  and  $\sigma$  represent the mean and standard deviation of the closed and open state current (pA),  
565  $A_1$  and  $A_2$  are the weights of the closed and open state Gaussian components, respectively, and  $C$   
566 is baseline current. Open probability was calculated as  $P_o = A_2 / (A_2 + A_1)$ . The response to pressure,  
567  $P_o(x) - P_o(0)$ , where  $x$  stands for -10 or -30 mmHg, was obtained as the difference in  $P_o$  values  
568 within the same trace. The single-channel closed and open times were calculated in pClamp 11.1  
569 from idealized single-channel data. Data are expressed as means  $\pm$  standard error (SEM). Change  
570 from shear stress or pressure was considered statistically significant when  $P < 0.05$  for mechano-  
571 stimulus vs. control, as determined by a 2-way ANOVA with Dunnett's post-test.

572           ***Single-channel data analysis and simulations:*** The analysis and simulations were done  
573 with the QuB program, the MLab edition (<http://milesclub.org/QuB.html>). QuB was used to  
574 digitally low-pass filter the data at 0.5 kHz to eliminate a periodic artifact induced by the pressure  
575 clamp system (Figure 2 Suppl. G) and to extract (“idealize”) the signal from the noisy data. QuB  
576 was further used to simulate the behavior of the tested NaChBac model and to calculate its  
577 properties: the voltage-activation curve at different pressures, the pressure-activation curve at  
578 different voltages, and the probability density function for closed and open dwell times, and to  
579 extract rate constants from single channel data, using a first-order approximation to correct for  
580 missed events<sup>40</sup>.

581           ***Nav channel model:*** To capture the basic properties of the NaChBac channel  
582 (homotetramer, inactivation removed), we used the simple linear kinetic scheme C<sub>1</sub>-C<sub>2</sub>-C<sub>3</sub>-C<sub>4</sub>-C<sub>5</sub>-  
583 O<sub>6</sub>. Each rate constant had the general expression  $k = k_0 \times \exp(k_v \times V + k_p \times P)$ , where  $V$  is  
584 membrane potential,  $P$  is patch pressure,  $k_0$  is a pre-exponential factor representing the value of  
585 the rate constant at zero voltage and pressure, and  $k_v$  and  $k_p$  are sensitivity factors for voltage and  
586 pressure, respectively. Lack of voltage or pressure dependence was encoded by setting  $k_v$  or  $k_p$  to  
587 zero. The rates along the activation pathway were in the expected 4:3:2:1 ratio (e.g.,  $k_{23} = 2 \times k_{45}$ ).  
588 The parameters of the model were tweaked by hand to match the macroscopic and single-channel  
589 data. First, we chose a set of  $k_0$  preexponential parameters for the C<sub>5</sub>-O<sub>6</sub> transition, to match the  
590 observed P<sub>O</sub> at saturating voltages (at -20 mV). Then, we adjusted the  $k_v$  exponential parameters  
591 that describe the voltage sensitivity of the C<sub>1</sub> through C<sub>5</sub> transitions, to match the normalized  
592 macroscopic activation curve under no-shear conditions. Next, we determined the statistical  
593 distribution (average and standard deviation) of the resting potential of the single-channel patched  
594 cells—to match the voltage-dependent P<sub>O</sub> curve—which is voltage-shifted and shallower relative

595 to the macroscopic activation curve. To generate a  $P_O$  curve that takes into account the variable  
596 and non-zero resting potential, the  $P_O$  value at each voltage point was obtained by numerically  
597 integrating over the Gaussian distribution describing the resting potential. Next, we adjusted the  
598  $k_0$  preexponential parameters for the  $C_1$  through  $C_5$  transitions to approximately match the  
599 observed single-channel lifetimes. Finally, for the MSO model, we adjusted the  $k_p$  exponential  
600 parameters describing the pressure sensitivity of the  $C_5$  to  $C_6$  transition, to match the  $P_O$  curve  
601 under negative patch pressure. The same  $k_p$  values were also used for the MSA model.

## 602 **ACKNOWLEDGEMENTS**

603 We would like to thank Drs. Simone Mazzaferro, Steven Sine, Paul DeCaen, Fred Sachs,  
604 Mirela Milescu, and Corrie DaCosta for their constructive suggestions, Denika Mueller for  
605 technical assistance, and Kristy Zodrow for administrative assistance. L.S.M. acknowledges the  
606 gracious support provided by Dr. Sergei Sukharev and the University of Maryland at College Park.  
607 NIH DK052766, DK123549, AT010875.

## 608 **AUTHOR CONTRIBUTIONS**

609 Peter R. Strege: conceived and designed research, performed experiments, analyzed data,  
610 interpreted results of experiments, prepared figures, drafted manuscript, edited and revised  
611 manuscript, approved the final version of the manuscript

612 Luke M. Cowan: performed experiments, analyzed data, interpreted results of experiments, edited  
613 and revised manuscript, approved the final version of the manuscript

614 Amelia Mazzone: performed experiments, approved the final version of the manuscript

615 Constanza Alcaino: performed experiments, approved the final version of the manuscript

616 Christopher A. Ahern: conceived and designed research, edited and revised manuscript, approved  
617 the final version of the manuscript

618 Lorin S. Milesco: conceived and designed research, wrote analysis scripts, interpreted results of  
619 experiments, edited and revised manuscript, approved the final version of the manuscript

620 Gianrico Farrugia: conceived and designed research, interpreted results of experiments, edited and  
621 revised manuscript, approved the final version of the manuscript

622 Arthur Beyder: conceived and designed research, analyzed data, interpreted results of experiments,  
623 drafted manuscript, edited and revised manuscript, approved the final version of the manuscript

624

625 Conflict of interest: None.

626

627  
628  
629  
630  
631  
632  
633  
634  
635  
636  
637  
638  
639  
640  
641  
642  
643  
644  
645  
646  
647  
648  
649  
650  
651  
652  
653  
654  
655  
656  
657  
658  
659  
660  
661  
662  
663  
664  
665  
666  
667  
668  
669  
670

## References

- 1 Hille, B. *Ion channels of excitable membranes*. Third edn, (Sinauer Associates, Inc., 2001).
- 2 Kohl, P., Sachs, F. & Franz, M. R. *Cardiac Mechano-Electric Feedback and Arrhythmias: From Pipette to Patient*. First edn, (Elsevier Saunders, 2005).
- 3 Brohawn, S. G., Su, Z. & MacKinnon, R. Mechanosensitivity is mediated directly by the lipid membrane in TRAAK and TREK1 K<sup>+</sup> channels. *Proc. Natl. Acad. Sci. U. S. A.* **111**, 3614-3619, doi:10.1073/pnas.1320768111 (2014).
- 4 Ranade, S. S., Syeda, R. & Patapoutian, A. Mechanically Activated Ion Channels. *Neuron* **87**, 1162-1179, doi:10.1016/j.neuron.2015.08.032 (2015).
- 5 Conti, F., Fioravanti, R., Segal, J. R. & Stuhmer, W. Pressure dependence of the sodium currents of squid giant axon. *J. Membr. Biol.* **69**, 23-34, doi:10.1007/BF01871238 (1982).
- 6 Conti, F., Inoue, I., Kukita, F. & Stuhmer, W. Pressure dependence of sodium gating currents in the squid giant axon. *Eur. Biophys. J.* **11**, 137-147, doi:10.1007/BF00276629 (1984).
- 7 Hao, J. *et al.* Kv1.1 channels act as mechanical brake in the senses of touch and pain. *Neuron* **77**, 899-914, doi:10.1016/j.neuron.2012.12.035 (2013).
- 8 Strege, P. R. *et al.* Cytoskeletal modulation of sodium current in human jejunal circular smooth muscle cells. *Am. J. Physiol. Cell Physiol.* **284**, C60-66 (2003).
- 9 Terakawa, S. Changes in intracellular pressure in squid giant axons associated with production of action potentials. *Biochem. Biophys. Res. Commun.* **114**, 1006-1010, doi:10.1016/0006-291x(83)90661-7 (1983).
- 10 Morris, C. E. & Juranka, P. F. Nav channel mechanosensitivity: activation and inactivation accelerate reversibly with stretch. *Biophys. J.* **93**, 822-833 (2007).
- 11 Schmidt, D., Del Marmol, J. & Mackinnon, R. Mechanistic basis for low threshold mechanosensitivity in voltage-dependent K<sup>+</sup> channels. *Proc. Natl. Acad. Sci. U. S. A.*, doi:10.1073/pnas.1204700109 (2012).
- 12 Farrugia, G. *et al.* A mechanosensitive calcium channel in human intestinal smooth muscle cells. *Gastroenterology* **117**, 900-905, doi:10.1016/s0016-5085(99)70349-5 (1999).
- 13 Pathak, M. M. *et al.* The Hv1 proton channel responds to mechanical stimuli. *J. Gen. Physiol.* **148**, 405-418, doi:10.1085/jgp.201611672 (2016).
- 14 Lin, W., Laitko, U., Juranka, P. F. & Morris, C. E. Dual stretch responses of mHCN2 pacemaker channels: accelerated activation, accelerated deactivation. *Biophys. J.* **92**, 1559-1572, doi:10.1529/biophysj.106.092478 (2007).
- 15 Gaub, B. M. *et al.* Neurons differentiate magnitude and location of mechanical stimuli. *Proc. Natl. Acad. Sci. U. S. A.*, doi:10.1073/pnas.1909933117 (2019).
- 16 Gellens, M. E. *et al.* Primary structure and functional expression of the human cardiac tetrodotoxin-insensitive voltage-dependent sodium channel. *Proc. Natl. Acad. Sci. U. S. A.* **89**, 554-558 (1992).
- 17 Beyder, A. *et al.* Mechanosensitivity of Nav1.5, a voltage-sensitive sodium channel. *J. Physiol.* **588**, 4969-4985, doi:10.1113/jphysiol.2010.199034 (2010).
- 18 Banderali, U., Juranka, P. F., Clark, R. B., Giles, W. R. & Morris, C. E. Impaired stretch modulation in potentially lethal cardiac sodium channel mutants. *Channels (Austin)* **4**, 12-21, doi:10260 [pii] (2010).

- 671 19 Beyder, A. *et al.* Loss-of-function of the voltage-gated sodium channel Nav1.5  
672 (channelopathies) in patients with irritable bowel syndrome. *Gastroenterology* **146**, 1659-  
673 1668, doi:10.1053/j.gastro.2014.02.054 (2014).
- 674 20 Strege, P. R. *et al.* Irritable bowel syndrome (IBS) patients have SCN5A channelopathies  
675 that lead to decreased Nav1.5 current and mechanosensitivity. *American journal of*  
676 *physiology* **314**, G494-G503, doi:10.1152/ajpgi.00016.2017 (2017).
- 677 21 Beyder, A., Strege, P. R., Bernard, C. & Farrugia, G. Membrane permeable local  
678 anesthetics modulate Nav 1.5 mechanosensitivity. *Channels (Austin)* **6**, 308-316 (2012).
- 679 22 Beyder, A. *et al.* Ranolazine decreases mechanosensitivity of the voltage-gated sodium ion  
680 channel Nav1.5: a novel mechanism of drug action. *Circulation* **125**, 2698-2706 (2012).
- 681 23 Patlak, J. Molecular kinetics of voltage-dependent Na<sup>+</sup> channels. *Physiol. Rev.* **71**, 1047-  
682 1080, doi:10.1152/physrev.1991.71.4.1047 (1991).
- 683 24 Schmidt, D., Del Marmol, J. & Mackinnon, R. Mechanistic basis for low threshold  
684 mechanosensitivity in voltage-dependent K<sup>+</sup> channels. *Proc. Natl. Acad. Sci. U. S. A.*,  
685 doi:10.1073/pnas.1204700109 (2012).
- 686 25 Bagnieris, C. *et al.* Prokaryotic NavMs channel as a structural and functional model for  
687 eukaryotic sodium channel antagonism. *Proc. Natl. Acad. Sci. U. S. A.* **111**, 8428-8433,  
688 doi:10.1073/pnas.1406855111 (2014).
- 689 26 Ren, D. *et al.* A prokaryotic voltage-gated sodium channel. *Science* **294**, 2372-2375 (2001).
- 690 27 Lee, S., Goodchild, S. J. & Ahern, C. A. Local anesthetic inhibition of a bacterial sodium  
691 channel. *J. Gen. Physiol.* **139**, 507-516 (2012).
- 692 28 Lee, S., Goodchild, S. J. & Ahern, C. A. Molecular and functional determinants of local  
693 anesthetic inhibition of NaChBac. *Channels* **6**, 403-406, doi:10.4161/chan.21807 (2012).
- 694 29 Catterall, W. A. & Zheng, N. Deciphering voltage-gated Na(+) and Ca(2+) channels by  
695 studying prokaryotic ancestors. *Trends Biochem Sci* **40**, 526-534,  
696 doi:10.1016/j.tibs.2015.07.002 (2015).
- 697 30 Dubin, A. E. *et al.* Endogenous Piezo1 Can Confound Mechanically Activated Channel  
698 Identification and Characterization. *Neuron* **94**, 266-270 e263,  
699 doi:10.1016/j.neuron.2017.03.039 (2017).
- 700 31 Besch, S. R., Suchyna, T. & Sachs, F. High-speed pressure clamp. *Pflugers Arch.* **445**, 161-  
701 166 (2002).
- 702 32 Vandenberg, C. A. & Bezanilla, F. A sodium channel gating model based on single  
703 channel, macroscopic ionic, and gating currents in the squid giant axon. *Biophys. J.* **60**,  
704 1511-1533, doi:10.1016/S0006-3495(91)82186-5 (1991).
- 705 33 Coste, B. *et al.* Piezo1 and Piezo2 are essential components of distinct mechanically  
706 activated cation channels. *Science* **330**, 55-60, doi:10.1126/science.1193270 (2010).
- 707 34 Suchyna, T. M., Markin, V. S. & Sachs, F. Biophysics and structure of the patch and the  
708 gigaseal. *Biophys. J.* **97**, 738-747, doi:10.1016/j.bpj.2009.05.018 (2009).
- 709 35 Gottlieb, P. A., Bae, C. & Sachs, F. Gating the mechanical channel Piezo1: a comparison  
710 between whole-cell and patch recording. *Channels (Austin)* **6**, 282-289,  
711 doi:10.4161/chan.21064 (2012).
- 712 36 Wang, J. A. *et al.* Membrane trauma and Na<sup>+</sup> leak from Nav1.6 channels. *Am J Physiol*  
713 *Cell Physiol* **297**, C823-834, doi:10.1152/ajpcell.00505.2008 (2009).
- 714 37 Gamal El-Din, T. M., Lenaeus, M. J., Ramanadane, K., Zheng, N. & Catterall, W. A.  
715 Molecular dissection of multiphase inactivation of the bacterial sodium channel NaVAβ.  
716 *J. Gen. Physiol.* **151**, 174-185, doi:10.1085/jgp.201711884 (2019).

- 717 38 Aldrich, R. W., Corey, D. P. & Stevens, C. F. A reinterpretation of mammalian sodium  
718 channel gating based on single channel recording. *Nature* **306**, 436-441,  
719 doi:10.1038/306436a0 (1983).
- 720 39 Kuo, C. C. & Bean, B. P. Na<sup>+</sup> channels must deactivate to recover from inactivation.  
721 *Neuron* **12**, 819-829, doi:10.1016/0896-6273(94)90335-2 (1994).
- 722 40 Qin, F., Auerbach, A. & Sachs, F. Estimating single-channel kinetic parameters from  
723 idealized patch-clamp data containing missed events. *Biophys. J.* **70**, 264-280,  
724 doi:10.1016/S0006-3495(96)79568-1 (1996).
- 725 41 Navarro, M. A., Salari, A., Milescu, M. & Milescu, L. S. Estimating kinetic mechanisms  
726 with prior knowledge II: Behavioral constraints and numerical tests. *J. Gen. Physiol.* **150**,  
727 339-354, doi:10.1085/jgp.201711912 (2018).
- 728 42 Salari, A., Navarro, M. A., Milescu, M. & Milescu, L. S. Estimating kinetic mechanisms  
729 with prior knowledge I: Linear parameter constraints. *J. Gen. Physiol.* **150**, 323-338,  
730 doi:10.1085/jgp.201711911 (2018).
- 731 43 Martinac, B., Adler, J. & Kung, C. Mechanosensitive ion channels of *E. coli* activated by  
732 amphipaths. *Nature* **348**, 261-263, doi:10.1038/348261a0 (1990).
- 733 44 Perozo, E., Cortes, D. M., Sompornpisut, P., Kloda, A. & Martinac, B. Open channel  
734 structure of MscL and the gating mechanism of mechanosensitive channels. *Nature* **418**,  
735 942-948, doi:10.1038/nature00992 (2002).
- 736 45 Sachs, F. & Morris, C. E. Mechanosensitive ion channels in nonspecialized cells. *Rev.*  
737 *Physiol. Biochem. Pharmacol.* **132**, 1-77 (1998).
- 738 46 Fowler, P. W. & Sansom, M. S. The pore of voltage-gated potassium ion channels is  
739 strained when closed. *Nat. Commun.* **4**, 1872, doi:10.1038/ncomms2858 (2013).
- 740 47 Boiteux, C. *et al.* Local anesthetic and antiepileptic drug access and binding to a bacterial  
741 voltage-gated sodium channel. *Proc. Natl. Acad. Sci. U. S. A.* **111**, 13057-13062,  
742 doi:10.1073/pnas.1408710111 (2014).
- 743 48 McCusker, E. C. *et al.* Structure of a bacterial voltage-gated sodium channel pore reveals  
744 mechanisms of opening and closing. *Nat. Commun.* **3**, 1102, doi:10.1038/ncomms2077  
745 (2012).
- 746 49 Beyder, A. & Sachs, F. Electromechanical coupling in the membranes of Shaker-  
747 transfected HEK cells. *Proc. Natl. Acad. Sci. U. S. A.* **106**, 6626-6631 (2009).
- 748 50 Webster, S. M., del Camino, D., Dekker, J. P. & Yellen, G. Intracellular gate opening in  
749 Shaker K<sup>+</sup> channels defined by high-affinity metal bridges. *Nature* **428**, 864-868 (2004).
- 750 51 Zhao, Y., Yarov-Yarovoy, V., Scheuer, T. & Catterall, W. A. A gating hinge in Na<sup>+</sup>  
751 channels; a molecular switch for electrical signaling. *Neuron* **41**, 859-865,  
752 doi:10.1016/s0896-6273(04)00116-3 (2004).
- 753 52 Lenaeus, M. J. *et al.* Structures of closed and open states of a voltage-gated sodium channel.  
754 *Proc. Natl. Acad. Sci. U. S. A.* **114**, E3051-E3060, doi:10.1073/pnas.1700761114 (2017).
- 755 53 Iwasa, K., Tasaki, I. & Gibbons, R. C. Swelling of nerve fibers associated with action  
756 potentials. *Science* **210**, 338-339, doi:10.1126/science.7423196 (1980).
- 757 54 DeCaen, P. G., Yarov-Yarovoy, V., Sharp, E. M., Scheuer, T. & Catterall, W. A. Sequential  
758 formation of ion pairs during activation of a sodium channel voltage sensor. *Proc. Natl.*  
759 *Acad. Sci. U. S. A.* **106**, 22498-22503, doi:10.1073/pnas.0912307106 (2009).
- 760 55 Hodgkin, A. L. & Huxley, A. F. A quantitative description of membrane current and its  
761 application to conduction and excitation in nerve. *J Physiol* **117**, 500-544 (1952).

- 762 56 Otway, R. *et al.* Stretch-sensitive KCNQ1 mutation A link between genetic and  
763 environmental factors in the pathogenesis of atrial fibrillation? *J. Am. Coll. Cardiol.* **49**,  
764 578-586, doi:S0735-1097(06)02864-6 [pii] 10.1016/j.jacc.2006.09.044 (2007).
- 765 57 Navarro, M. A. *et al.* Sodium channels implement a molecular leaky integrator that detects  
766 action potentials and regulates neuronal firing. *Elife* **9**, doi:10.7554/eLife.54940 (2020).
- 767 58 Tabarean, I. V., Juranka, P. & Morris, C. E. Membrane stretch affects gating modes of a  
768 skeletal muscle sodium channel. *Biophys. J.* **77**, 758-774 (1999).
- 769 59 Laitko, U., Juranka, P. F. & Morris, C. E. Membrane stretch slows the concerted step prior  
770 to opening in a Kv channel. *J. Gen. Physiol.* **127**, 687-701 (2006).
- 771 60 Morris, C. E. & Juranka, P. F. Nav channel mechanosensitivity: activation and inactivation  
772 accelerate reversibly with stretch. *Biophys. J.* **93**, 822-833 (2007).
- 773 61 Morris, C. E. Voltage-gated channel mechanosensitivity: Fact or Friction? *Front. Physiol.*  
774 **2**, 25, doi:10.3389/fphys.2011.00025 (2011).
- 775 62 Beyder, A. *et al.* Mechanosensitivity of Nav1.5, a voltage-sensitive sodium channel. *J.*  
776 *Physiol* **588**, 4969-4985, doi:10.1113/jphysiol.2010.199034 (2010).
- 777 63 Calabrese, B., Tabarean, I. V., Juranka, P. & Morris, C. E. Mechanosensitivity of N-type  
778 calcium channel currents. *Biophys. J.* **83**, 2560-2574 (2002).
- 779 64 Gu, C. X., Juranka, P. F. & Morris, C. E. Stretch-activation and stretch-inactivation of  
780 Shaker-IR, a voltage-gated K<sup>+</sup> channel. *Biophys. J.* **80**, 2678-2693 (2001).
- 781 65 Kefauver, J. M., Ward, A. B. & Patapoutian, A. Discoveries in structure and physiology of  
782 mechanically activated ion channels. *Nature* **587**, 567-576, doi:10.1038/s41586-020-2933-  
783 1 (2020).
- 784 66 Opsahl, L. R. & Webb, W. W. Lipid-glass adhesion in giga-sealed patch-clamped  
785 membranes. *Biophys. J.* **66**, 75-79, doi:10.1016/S0006-3495(94)80752-0 (1994).
- 786 67 Sigg, D. & Bezanilla, F. A physical model of potassium channel activation: from energy  
787 landscape to gating kinetics. *Biophys. J.* **84**, 3703-3716 (2003).
- 788 68 Woolfson, D. N., Mortishire-Smith, R. J. & Williams, D. H. Conserved positioning of  
789 proline residues in membrane-spanning helices of ion-channel proteins. *Biochem. Biophys.*  
790 *Res. Commun.* **175**, 733-737, doi:10.1016/0006-291x(91)91627-o (1991).
- 791 69 Beyder, A. & Sachs, F. Electromechanical coupling in the membranes of Shaker-  
792 transfected HEK cells. *Proc. Natl. Acad. Sci. U. S. A.* **106**, 6626-6631 (2009).
- 793 70 Long, S. B., Campbell, E. B. & Mackinnon, R. Voltage sensor of Kv1.2: structural basis  
794 of electromechanical coupling. *Science* **309**, 903-908, doi:10.1126/science.1116270  
795 (2005).
- 796 71 Bagneris, C. *et al.* Prokaryotic NavMs channel as a structural and functional model for  
797 eukaryotic sodium channel antagonism. *Proc. Natl. Acad. Sci. U. S. A.* **111**, 8428-8433,  
798 doi:10.1073/pnas.1406855111 (2014).
- 799 72 Shaya, D. *et al.* Structure of a prokaryotic sodium channel pore reveals essential gating  
800 elements and an outer ion binding site common to eukaryotic channels. *J. Mol. Biol.* **426**,  
801 467-483, doi:10.1016/j.jmb.2013.10.010 (2014).
- 802 73 Anishkin, A., Loukin, S. H., Teng, J. & Kung, C. Feeling the hidden mechanical forces in  
803 lipid bilayer is an original sense. *Proc. Natl. Acad. Sci. U. S. A.* **111**, 7898-7905,  
804 doi:10.1073/pnas.1313364111 (2014).
- 805 74 Zheng, H., Liu, W., Anderson, L. Y. & Jiang, Q. X. Lipid-dependent gating of a voltage-  
806 gated potassium channel. *Nat. Commun.* **2**, 250, doi:10.1038/ncomms1254 (2011).



- 807 75 Kung, C. A possible unifying principle for mechanosensation. *Nature* **436**, 647-654,  
808 doi:10.1038/nature03896 (2005).
- 809 76 Cantor, R. S. Lateral pressures in cell membranes: A mechanism for modulation of protein  
810 function. *J. Phys. Chem.* **101**, 1723-1725 (1997).
- 811 77 Gullingsrud, J. & Schulten, K. Lipid bilayer pressure profiles and mechanosensitive  
812 channel gating. *Biophys. J.* **86**, 3496-3509, doi:10.1529/biophysj.103.034322 (2004).
- 813 78 Perozo, E., Kloda, A., Cortes, D. M. & Martinac, B. Physical principles underlying the  
814 transduction of bilayer deformation forces during mechanosensitive channel gating. *Nat.*  
815 *Struct. Biol.* **9**, 696-703, doi:10.1038/nsb827 (2002).
- 816 79 Cox, C. D., Bavi, N. & Martinac, B. Biophysical Principles of Ion-Channel-Mediated  
817 Mechanosensory Transduction. *Cell. Rep.* **29**, 1-12, doi:10.1016/j.celrep.2019.08.075  
818 (2019).
- 819 80 Schmidt, D., Jiang, Q. X. & MacKinnon, R. Phospholipids and the origin of cationic gating  
820 charges in voltage sensors. *Nature* **444**, 775-779, doi:10.1038/nature05416 (2006).
- 821 81 Shaya, D. *et al.* Voltage-gated sodium channel (NaV) protein dissection creates a set of  
822 functional pore-only proteins. *Proc. Natl. Acad. Sci. U. S. A.* **108**, 12313-12318,  
823 doi:10.1073/pnas.1106811108 (2011).
- 824 82 Milescu, M. *et al.* Interactions between lipids and voltage sensor paddles detected with  
825 tarantula toxins. *Nat. Struct. Mol. Biol.* **16**, 1080-1085, doi:10.1038/nsmb.1679 (2009).
- 826 83 Cowan, L. M. *et al.* Capsaicin alters human NaV1.5 mechanosensitivity. *BioRxiv* (2021).
- 827 84 Saito, Y. A. *et al.* Sodium channel mutation in irritable bowel syndrome: evidence for an  
828 ion channelopathy. *American journal of physiology* **296**, G211-218 (2009).
- 829 85 Benndorf, K. Properties of single cardiac Na channels at 35 degrees C. *J. Gen. Physiol.*  
830 **104**, 801-820, doi:10.1085/jgp.104.5.801 (1994).
- 831

832 **FIGURE LEGENDS**

833 **Figure 1. Shear stress increases the peak Na<sup>+</sup> current of eukaryotic Nav1.5 and prokaryotic**

834 **Nav channel NaChBac. (A)** Topologies of eukaryotic Nav channel Nav1.5 (black) and

835 prokaryotic Nav channel NaChBac, without (WT, blue) or with (T220A, red) point mutation

836 T220A, which makes NaChBac devoid of inactivation. **(B)** Representative Na<sup>+</sup> currents elicited

837 by a depolarization from -120 mV to -40 mV of Nav1.5 (black) and WT NaChBac (blue) or T220A

838 NaChBac (red), before (—) or during (—) shear stress. **(C)** Difference currents obtained by

839 subtracting the control trace from the shear trace in (B). **(D)** Voltage-dependent conductance

840 normalized to the maximum conductance of controls ( $G/G_{Max,Control}$ ) for Nav1.5 (black), WT

841 NaChBac (blue) or T220A NaChBac (red), before (—) or during (—) shear stress (n = 7-10 cells;

842  $P < 0.05$  by a paired 2-tailed t-test when comparing shear to control at voltages  $> -70$  mV for Nav1.5,

843  $> -60$  mV for WT and  $> -80$  mV for T220A).

844 **Figure 2. Patch pressure increases the open channel probability of T220A NaChBac single**

845 **channels in P1KO cells. (A)** Representative traces of single T220A NaChBac channels

846 at -80, -60, -40, or -20 mV and with 0 (unshaded) or -10 mmHg (shaded region) applied to the

847 patch. **(B)** All-point histograms constructed from the traces shown in (a) at -80, -60, or -20 mV

848 and 0 (black) or -10 mmHg (red) binned every 0.2 pA. Bins were normalized to an area of 1 and

849 fit with a sum of two Gaussians, in which open events at -60 mV were 0.77 pA and 0.17  $P_o$  without

850 pressure and 0.75 pA and 0.72  $P_o$  (330% increase) with pressure; open events at -20 mV were 0.43

851 pA and 0.90  $P_o$  without pressure and 0.42 pA and 0.90  $P_o$  (0% increase) with pressure. **(C)** Mean

852 open probabilities ( $P_o$ ) at voltage steps from -100 to -20 mV with 0 (black) or -10 to -50 mmHg

853 (red gradient) pressure (n=7-21 cells per voltage; \* $P < 0.05$ , control vs. pressure by a paired 2-tailed

854 t-test). **(D)**  $P_o$  per voltage from (C), re-plotted versus pressure (0 to -50 mmHg).

855 **Figure 3. Pressure-sensitive increase in whole-cell peak currents and single-channel open**  
856 **probability of T220A NaChBac is reversible. (A)** Representative whole cell currents from HEK  
857 cells expressing T220A NaChBac were elicited by a voltage protocol (Figure 1 Suppl. A) before  
858 (black), during (red), or after (blue) shear stress. **(B)** Peak current densities before (black), during  
859 (red), or after (blue) shear stress (n = 5 cells, \*P<0.05 to pre-control by a one-way ANOVA with  
860 Dunnett's post-test). **(C)** Representative single channel activity at -60 mV from Piezo1-knockout  
861 HEK cells transfected with T220A NaChBac, before (unshaded), during (shaded region), or after  
862 application of -30 mmHg to the patch for 500 ms. **(D)** All-sample distributions of single channel  
863 activity from the cell shown in (C), binned every 0.05 pA with peaks at 0 pA (closed) and ~0.9 pA  
864 (open). **(E)** Mean open channel probability ( $P_o$ ) per cell (gray circles) before (black), during (red),  
865 or after (blue) application of -30 mmHg pressure. **(F)** Differences in post-pressure  $P_o$  ( $\Delta P_o$ ) from  
866 pre-pressure controls.

867 **Figure 4. Pressure destabilizes the T220A NaChBac closed state. (A)** Mechanosensitive  
868 activation (MSA) depicts a model in which the  $C_1$  to  $C_5$  closed state transitions are both voltage-  
869 and pressure-dependent (blue and red); mechanosensitive opening (MSO) depicts a model in  
870 which the  $C_1$  to  $C_5$  closed state transitions are voltage-dependent (blue), and the  $C_5$  closed to  $O_6$   
871 open state transition is pressure-dependent (red). Rate constants:  $k_a = 800 \times e^{0.055 \times V}$ ,  $k_d =$   
872  $0.1 \times e^{-0.055 \times V}$ . **(B)** MSA (left) and MSO (right) model predictions of open probability ( $P_o$ ) across  
873 voltages from -110 to -30 mV with 0 (black) or -28 mmHg applied pressure (dark red), compared  
874 to  $G/G_{Max}$  whole cell data (Figure 1D) with 0 (●) or 10 mL/min (○) fluid shear stress. **(C-D)** MSA  
875 (left) and MSO (right) model predictions of single channel  $P_o$  (●) plotted versus voltage (C) at  
876 pressures from 0 to -50 mmHg (red gradient) or versus pressure (D) at voltages from -100 to -20  
877 mV (blue gradient). **(E)** MSO model adapted fit to a single pressure-sensitive  $C_5$  to  $O_6$  transition

878 with pressure-dependent kinetic constants assigned for opening ( $k_o$ ) and closing ( $k_c$ ). Insets: top,  
879 closed (left) and open (right) dwell time histograms of single channel data versus the MSO model  
880 PDF curves; bottom, single channel trace recorded at -20 mV (black) and idealization (blue) with  
881 -10 mmHg applied to the region shaded (gray), compared to a trace from the MSO model. **(F)**  
882 MSA (top) and MSO (bottom) model prediction (blue) of single channel  $P_o$  at -60 mV before,  
883 during, and after pressure, compared to the average current from single channel data (black).

884 **Figure 5. I228G disrupts the pressure sensitivity of NaChBac background T220A. (A)**

885 Conformational change of prokaryotic  $Na^+$  channels from the closed (cyan, NavAb, 2017) to open  
886 state (magenta, NavMs, 2017), illustrating the movement of the voltage sensor, S4-S5 linker, S6  
887 segment, and C-terminal tail in relation to the lipid bilayer. **(B)** Location of key residues T220A  
888 and I228 in the S6 pore segment and D93 in the voltage sensor. **(C-D)** Voltage-dependent open  
889 probabilities ((D),  $P_o$ ) of single channel activities (C) recorded at the indicated voltages with 0 or  
890 -10 mmHg pressure from P1KO cells expressing the T220A NaChBac background (red or gray  
891 shading) or with additional mutations D93A (blue) or I228G (indigo). (\* $P < 0.05$ , -10 mmHg vs 0  
892 mmHg,  $n = 338$ -636 traces per voltage from 6-12 cells). Half-points of open probability (0 vs. -10  
893 mmHg): T220A, -45.6 vs. -58.1 mV; D93A, -65.1 vs. -72.3 mV; I228G, -42.1 vs. -43.9 mV. **(E)**  
894 Difference in open probability induced by -10 mmHg pressure ( $P_o(-10) - P_o(0)$ ) as a function of  
895 voltage in the control background (red or gray shading) or with D93A (blue) or I228G (indigo).

896 **Figure 6. Model of voltage-gated ion channel mechanosensitivity. (A)** VGIC pore is embedded

897 in the lipid bilayer, which has an intrinsic distribution of mechanical forces even with no tension  
898 added to the system. **(B)** Mechanical stress applied to the bilayer alters the profile of bilayer forces,  
899 which destabilizes the intracellular gate and leads to intracellular pore expansion.

900

901 **TABLES**

902 **Table 1. Effect of shear stress on parameters of wild-type and T220A NaChBac.**

903 Shear, flow of extracellular solution;  $I_{Peak}$ , maximum peak current density;  $G_{Max}$ , maximum peak  
 904 conductance;  $E_{Rev}$ , reversal potential;  $V_{1/2a}$ , voltage dependence of activation;  $\delta V_a$ , slope of steady-  
 905 state activation;  $V_{1/2i}$ , voltage dependence of inactivation;  $\delta V_i$ , slope of steady-state inactivation;  
 906  $\tau_a$ , time constant of activation at -30 mV;  $\tau_i$ , time constant of inactivation at -30 mV. The  
 907 background of Nav1.5 was H558/Q1077del. Number of cells: Nav1.5, 10; wild-type (WT)  
 908 NaChBac, 7; T220A NaChBac, 7; T220A/I228G NaChBac, 11. \* $P < 0.05$  shear vs. control by a  
 909 two-tailed paired Student's t-test.

|                    | Nav1.5      |              |            | WT NaChBac |             |             | T220A NaChBac |              |            |
|--------------------|-------------|--------------|------------|------------|-------------|-------------|---------------|--------------|------------|
|                    | Control     | Shear        | Change     | Control    | Shear       | Change      | Control       | Shear        | Change     |
| $I_{Peak}$ (pA/pF) | -134.3±16.4 | -164.0±18.5* | +23.6±3.5% | -37.0± 9.1 | -59.2±15.5* | +58.7±10.1% | -214.6±60.4   | -281.8±73.7* | +39.0±6.8% |
| $G_{Max}$ (nS)     | 2.21±0.28   | 2.75±0.32*   | +26.2±3.2% | 0.48±0.09  | 0.71±0.15*  | +47.0±10.9% | 2.96±0.81     | 3.72±0.95*   | +31.7±8.3% |
| $E_{Rev}$ (mV)     | +23.9±2.3   | +20.1±2.2*   | -3.8±0.4   | +55.6±5.9  | +55.2±5.3   | -0.3±2.4    | +21.9±2.4     | +18.8±2.5    | -3.1±1.7   |
| $V_{1/2a}$ (mV)    | -59.1±0.8   | -60.5±1.0    | -1.4±0.6   | -45.1±2.5  | -49.6±2.1*  | -4.4±0.6    | -70.8±2.3     | -74.5±2.2*   | -3.7±0.9   |
| $V_{1/2i}$ (mV)    | -93.0±2.1   | -95.5±2.4*   | -2.4±0.4   | -56.9±2.8  | -60.7±2.0*  | -3.7±1.1    | -44.1±5.4     | -56.4±3.5*   | -12.2±3.1  |
| $\delta V_a$       | 6.1±0.3     | 5.7±0.3*     | -0.4±0.1   | 8.1±0.6    | 6.8±0.3*    | -1.3±0.4    | 5.1±0.6       | 3.2±0.6      | -1.9±0.8   |
| $\delta V_i$       | -6.9±0.1    | -6.7±0.1*    | 0.2±0.1    | -6.0±0.2   | -5.8±0.3    | 0.2±0.3     | -14.3±1.9     | -13.2±2.3    | 0.4±2.2    |
| $\tau_a$ (ms)      | 0.49±0.04   | 0.43±0.03*   | -10.5±6.0% | 18.6±3.4   | 11.6±2.5*   | -39.3±3.8%  | 8.4±1.8       | 4.5±0.7*     | -42.1±5.6% |
| $\tau_i$ (ms)      | 0.77±0.07   | 0.53±0.04*   | -29.8±3.4% | 213.0±37.8 | 162.4±31.6* | -23.3±4.3%  | —             | —            | —          |

910  
 911 **Table 2. Effect of pressure on open probability of mutants D93A and I228G in the T220A**  
 912 **NaChBac background.**

913 Open probability;  $n = 6-12$  cells; \* $P < 0.05$ , -10 vs. 0 mmHg pressure, by a 2-tailed paired t-test;  
 914 † $P < 0.05$ , D93A or I228G vs. T220A background by a 2-tailed unpaired t-test.

| Voltage (mV) | T220A background |              |             | D93A        |              |               | I228G       |             |              |
|--------------|------------------|--------------|-------------|-------------|--------------|---------------|-------------|-------------|--------------|
|              | Control          | Pressure     | Difference  | Control     | Pressure     | Difference    | Control     | Pressure    | Difference   |
| -100         | 0.023±0.013      | 0.028±0.014  | 0.004±0.002 | 0.079±0.022 | 0.109±0.062  | 0.030±0.043   | 0.106±0.040 | 0.106±0.041 | 0.000±0.005  |
| -80          | 0.019±0.005      | 0.024±0.009  | 0.005±0.005 | 0.135±0.023 | 0.237±0.048* | 0.103±0.037†  | 0.114±0.057 | 0.121±0.058 | 0.006±0.011  |
| -60          | 0.176±0.044      | 0.271±0.069  | 0.096±0.043 | 0.471±0.082 | 0.554±0.080* | 0.082±0.014   | 0.153±0.058 | 0.191±0.073 | 0.038±0.025  |
| -40          | 0.353±0.071      | 0.443±0.070* | 0.090±0.025 | 0.657±0.051 | 0.665±0.045  | 0.008±0.023†  | 0.367±0.090 | 0.388±0.093 | 0.021±0.012† |
| -20          | 0.525±0.067      | 0.551±0.070* | 0.026±0.010 | 0.638±0.011 | 0.611±0.015  | -0.027±0.016† | 0.538±0.074 | 0.539±0.079 | 0.002±0.010  |

915  
 916 **Table 3. Primers for mutagenesis of I228G or D93A in the T220A NaChBac background.**

| <b>Mutation</b> | <b>Forward primer</b>                                    | <b>Reverse primer</b>                                    |
|-----------------|----------------------------------------------------------|----------------------------------------------------------|
| I228G           | TCATCTTTAACTTGTTTATCGGTGTAG<br>GCGTCAATAACGTTGAAAAAGCAGA | TCTGCTTTTTCAACGTTATTGACGCCT<br>ACACCGATAAACAAGTTAAAGATGA |
| D93A            | TGGTTTGCTTTCTTAATTGTAGCCGCA<br>GGT                       | ACCTGCGGCTACAATTAAGAAAGCAA<br>ACCA                       |

917

## 918 SUPPLEMENTARY FIGURE LEGENDS

919 **Figure 1 Supplement. Shear stress increases peak Na<sup>+</sup> current, hyperpolarizes the voltage-**  
920 **dependence, and accelerates the kinetics of eukaryotic and prokaryotic Nav channels in**  
921 **HEK293 cells. (A-B)** Voltage protocols (A) elicited currents (B) from Nav1.5 and WT or T220A  
922 NaChBac channels transiently expressed in HEK293 cells. Currents were recorded before  
923 (*control*) or during (*shear*) flow of bath (extracellular) solution through the recording chamber at  
924 a rate of 10 mL/min. **(C-D)** Time constants of activation (C,  $\tau_a$ ) or inactivation (D,  $\tau_i$ ) versus step  
925 voltage, before (●) or during (○) shear stress. **(E)** Current density-voltage relationship of peak Na<sup>+</sup>  
926 currents, before (●) or during (○) shear stress. **(F-G)** Steady-state voltage dependence of activation  
927 (F) and availability (G), recorded before (●) or during (○) shear stress. *Far right column*, mean  
928 parameters for the time constants of activation (C,  $\tau_a$ ) or inactivation (D,  $\tau_i$ ) at -30 mV, the  
929 maximum peak Na<sup>+</sup> current (E,  $I_{Peak}$ ), the half-point of steady-state activation (F,  $V_{1/2a}$ ), and the  
930 half-point of steady-state availability (G,  $V_{1/2i}$ ), recorded from paired controls (Control) or with  
931 shear stress (Shear). Voltage clamp data were recorded from n = 7-10 cells each; \*P<0.05 to  
932 control or †P<0.05 to Nav1.5 by two-way ANOVAs with Dunnett's post-test.

933 **Figure 2 Supplement. Endogenous channels in Piezo1-KO HEK (P1KO) cells are insensitive**  
934 **to pressure stimulus. (A)** Single channel activity from an untransfected P1KO cell before or  
935 during (shaded area) application of pressure by high-speed pressure clamp (HSPC). **(B)** All-sample  
936 distribution curves generated from all traces recorded from the cell represented in (A), at +60 mV  
937 and with 0 (black) or -30 mmHg pressure stimulus (red). **(C)** Voltage- and pressure-clamp  
938 protocols to test the pressure sensitivity of single channel currents to -30 mmHg at voltage steps  
939 from -60 through +100 mV. **(D)** Single channel currents averaged from 60 sweeps of the protocol  
940 shown in (C)—a holding voltage of -100 mV to steps from -50 to +100 mV with 0 (control) or -30

941 mmHg (pressure) applied to the patch. **(E)** Difference current obtained by subtracting pressure  
942 from control currents in **(D)** ( $I_{\text{Difference}} = I_{\text{Control}} - I_{\text{Pressure}}$ ). **(F)** Current-voltage (I-V) relationship  
943 from control (black symbols), pressure (red), or difference (white) currents at the plateau, as shown  
944 in **(D-E)**. (Inset) Enlargement of currents from -60 to 0 mV. **(G)** Noise spectrum averaged from 25  
945 ten-second traces without (black) or with (red) the high-speed pressure clamp (HSPC) connected  
946 to the patch clamp headstage. Vertical gray lines indicate multiples of 60 Hz. Noise exclusive to  
947 HSPC  $\approx 1.7$  kHz.

948 **Figure 3 Supplement. Effect of pressure on voltage dependent open probability. (A)** Protocols  
949 to test reversibility of pressure-dependent increases in  $P_o$ . **(B)** Current traces averaged from  
950 idealized single channel events in 4-17 cells at voltage steps from -100 to -20 mV, before (black),  
951 during (red), or after (blue) the pressure step to -30 mmHg. Shaded areas represent the difference  
952 in average  $P_o$  with pressure versus each pre-control baseline. **(C)** Single channel open probability  
953 versus voltage. **(D)** Differences in open probability ( $\Delta P_o$ ), subtracting the open probability before  
954 pressure from either pressure (red) or post-control (blue).

955 **Figure 5 Supplement. Whole cell voltage-dependent  $\text{Na}^+$  currents elicited from P1KO cells**  
956 **transfected with NaChBac mutants D93A or I228G in the T220A background. (A)** Voltage  
957 stimulus protocol to elicit whole cell  $\text{Na}^+$  currents by holding the cell at -170 (D93A) or -120 mV  
958 (I228G), then stepping to a voltage ladder from -120 through -60 (D93A) or through 0 mV (I228G)  
959 for 1 s, then to a single voltage at -80 mV for 200 ms (D93A) or -50 mV for 400 ms (I228G). **(B)**  
960 Whole cell  $\text{Na}^+$  currents elicited by the voltage protocols shown in **(A)**. **(C)** Steady-state activation  
961 curves versus the voltage of step 1 for the T220A background (red) or the mutants D93A (blue) or  
962 I228G (indigo). **(C)** Steady-state availability (inactivation) currents at step 2 versus the



963 conditioning voltage of step 1 for background (red) or mutant D93A (blue) or I228G (indigo)  
964 channels (n = 8 (T220A), 3 (D93A), or 11 (I228G) transfected P1KO cells).  
965

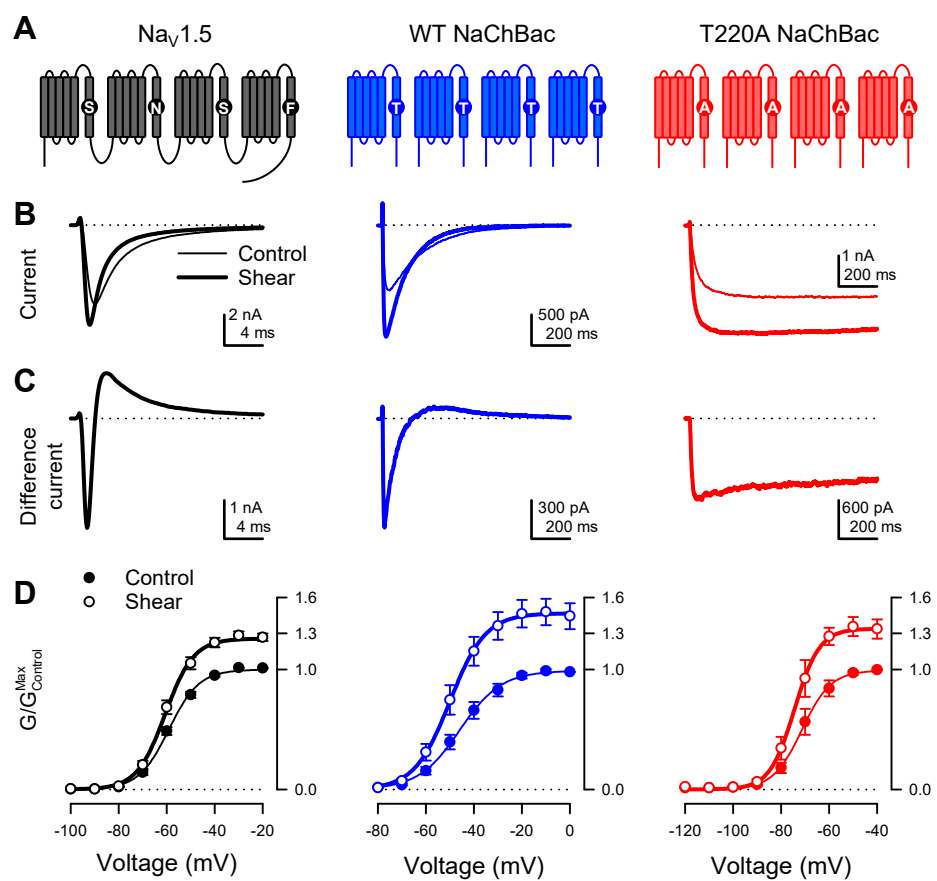

Figure 1

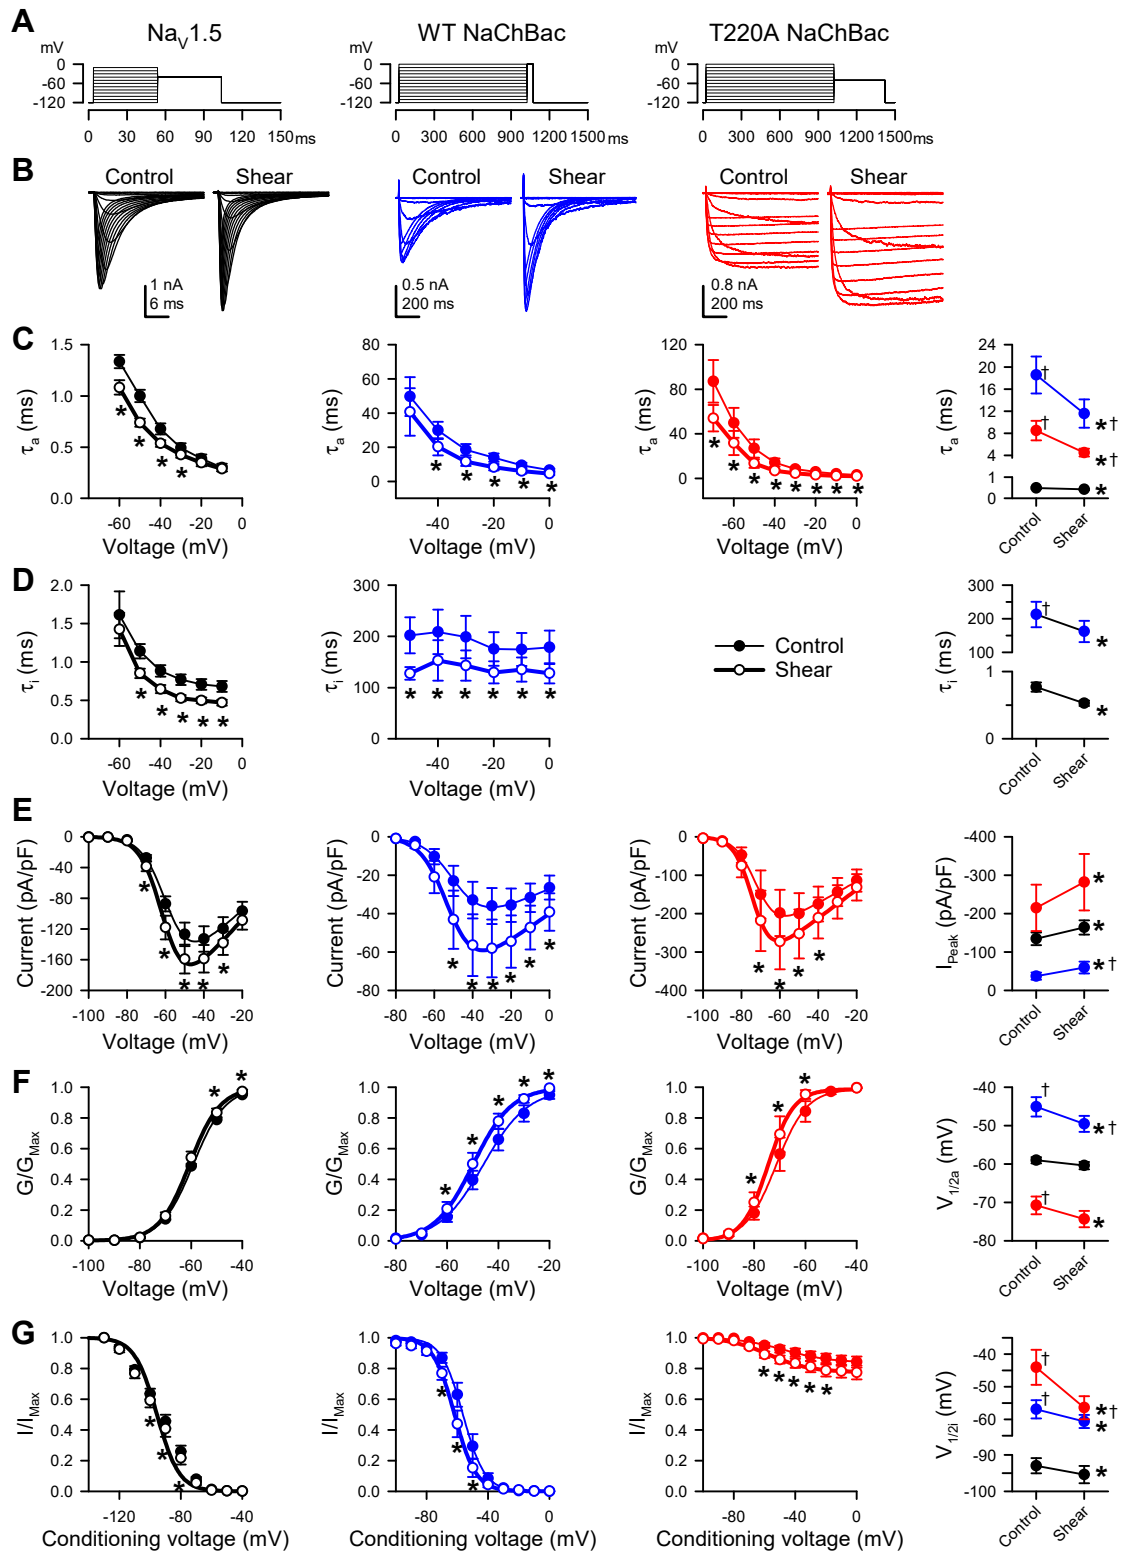

Figure 1 Supplement

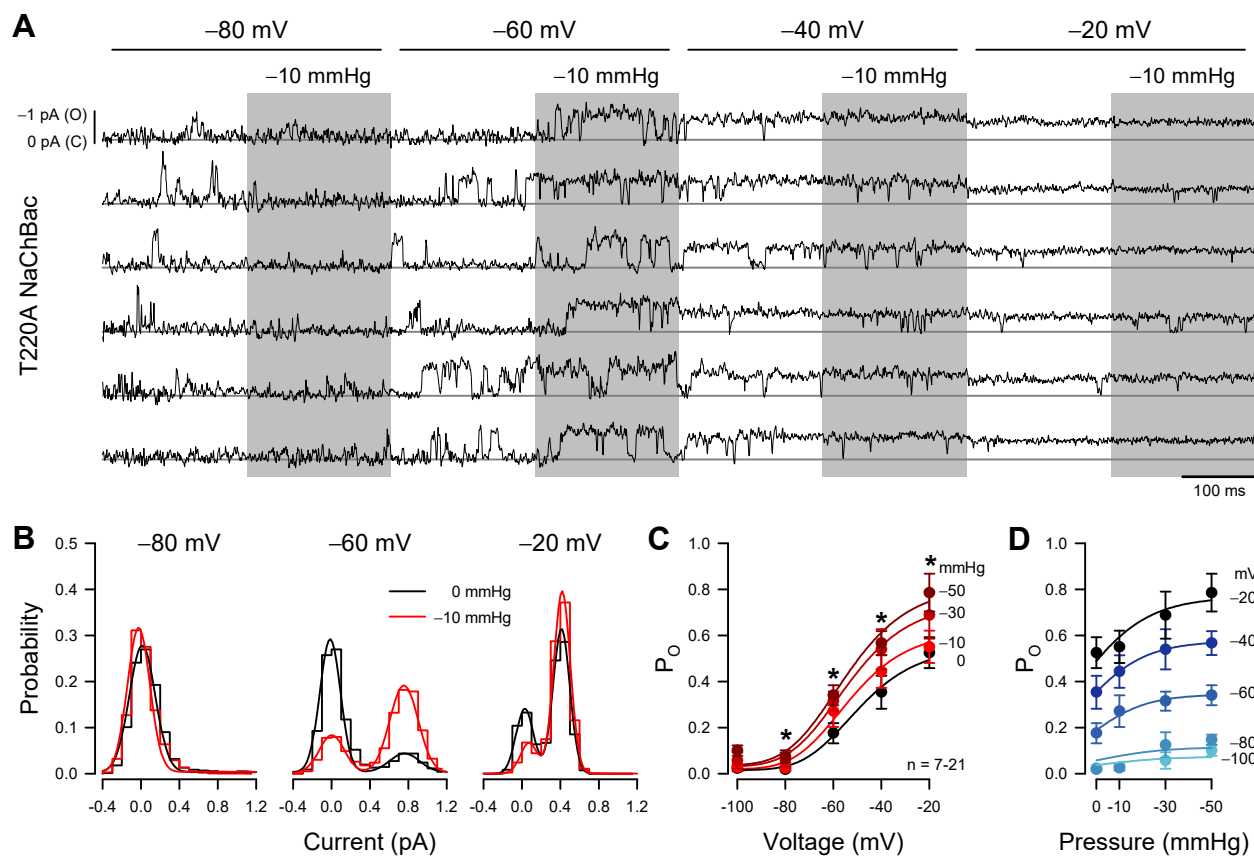

Figure 2

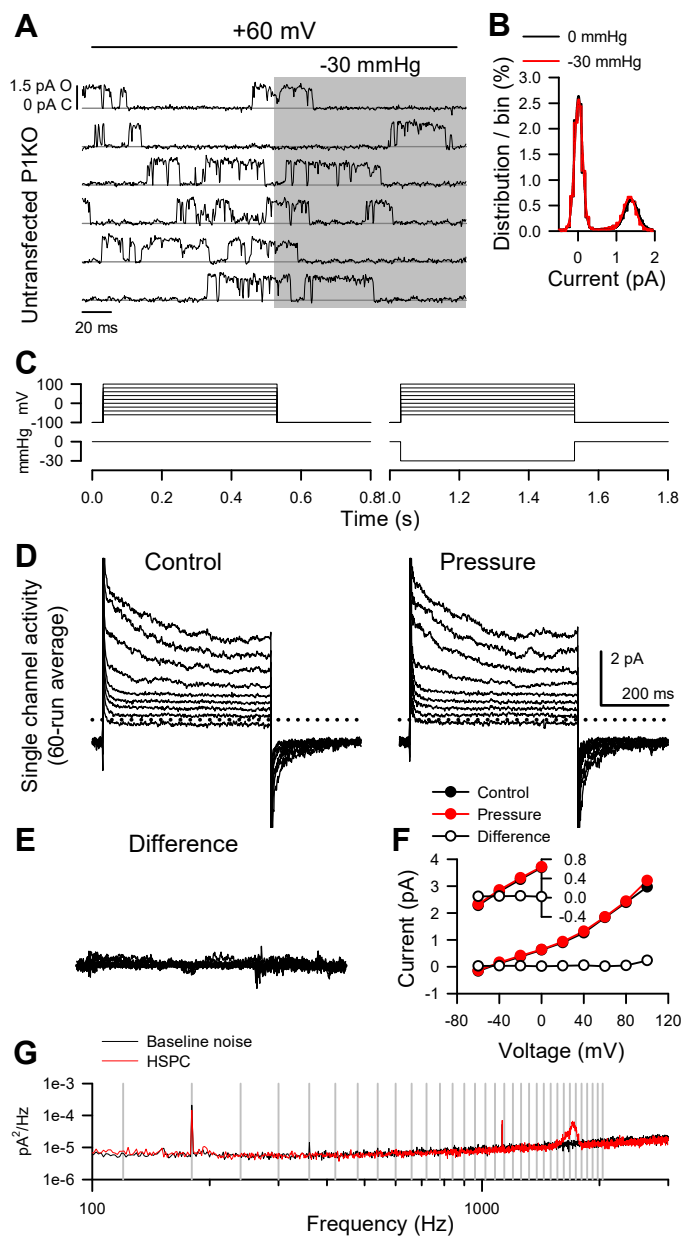

Figure 2 Supplement

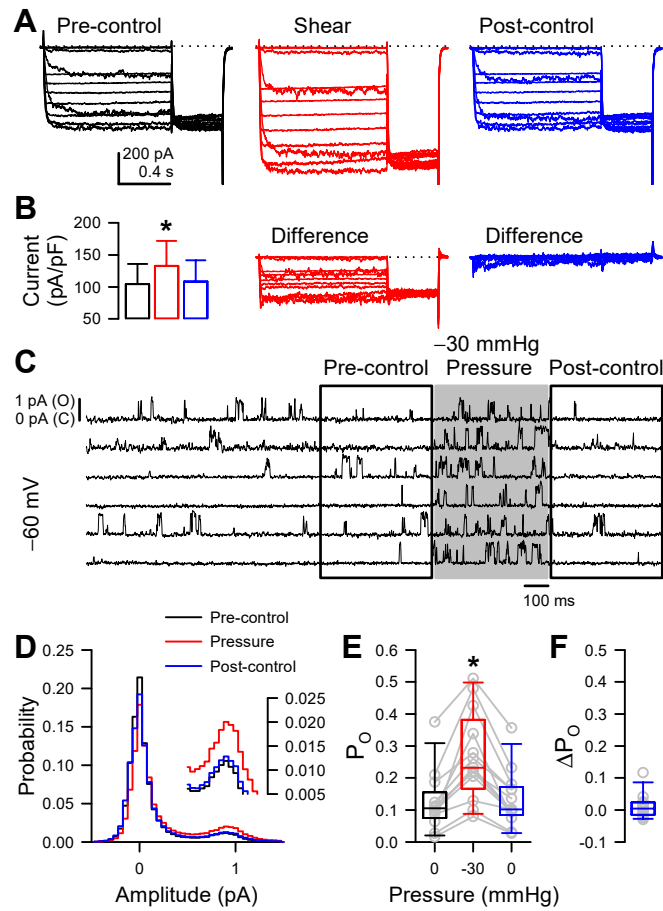

Figure 3

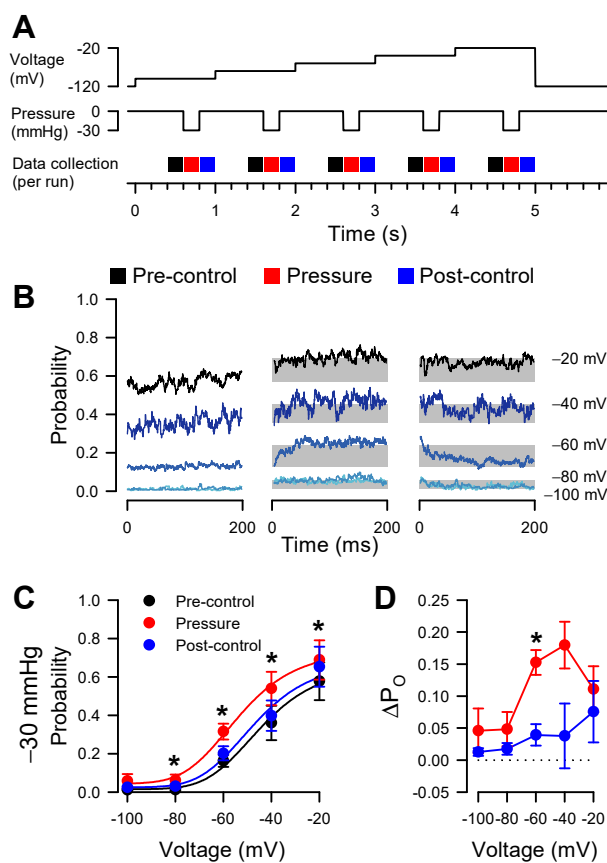

Figure 3 Supplement

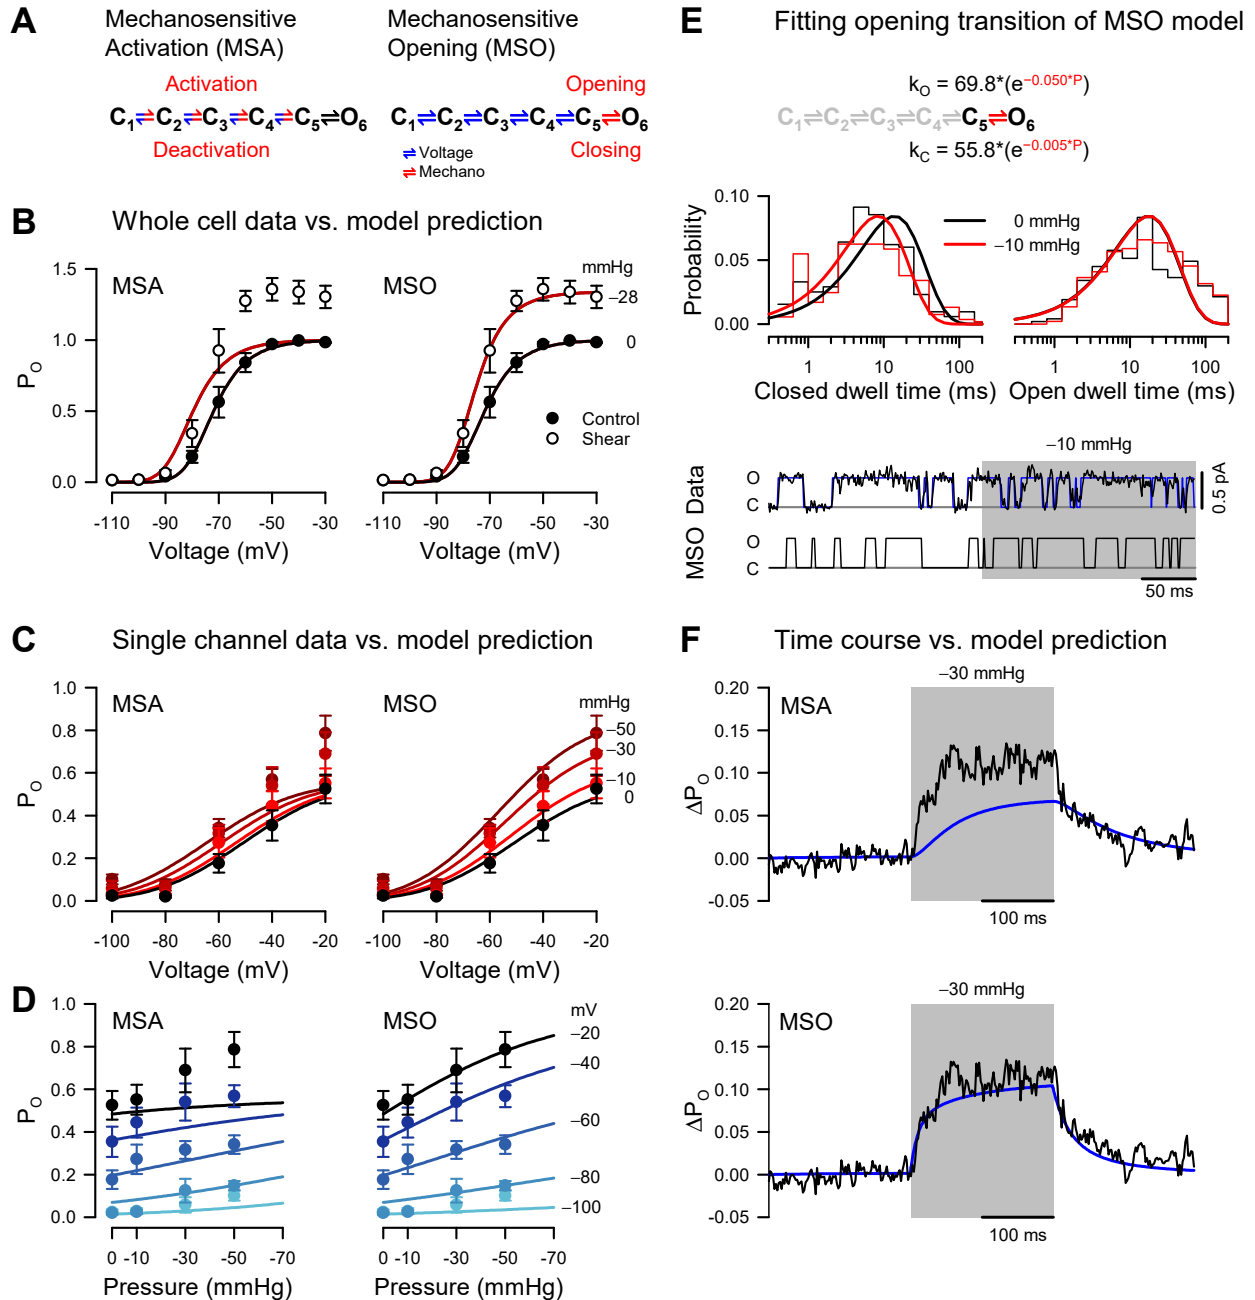

**Figure 4**



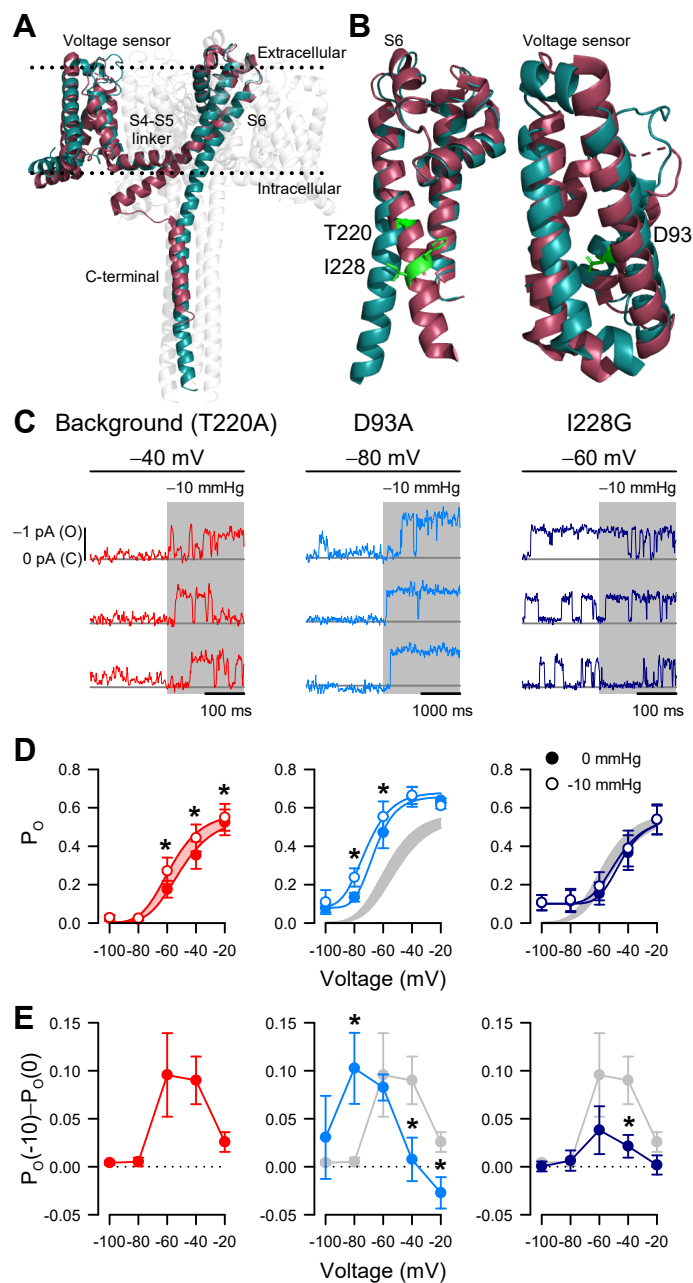

Figure 5

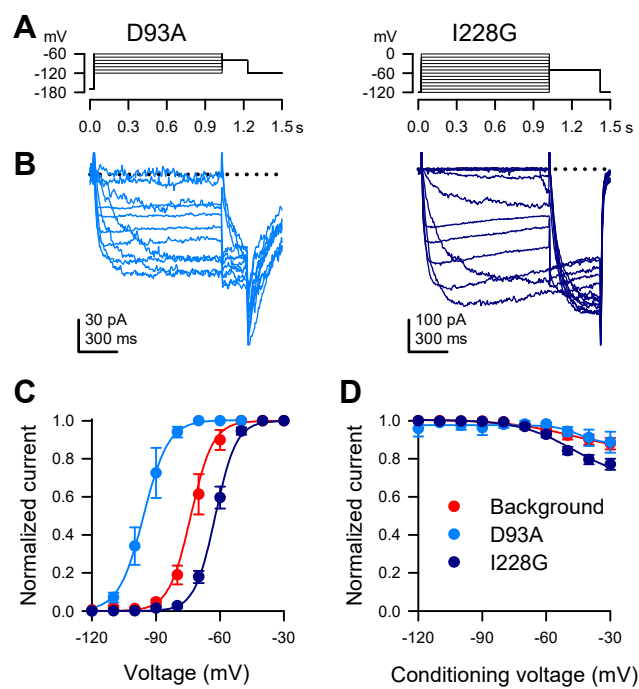

**Figure 5 Supplement**

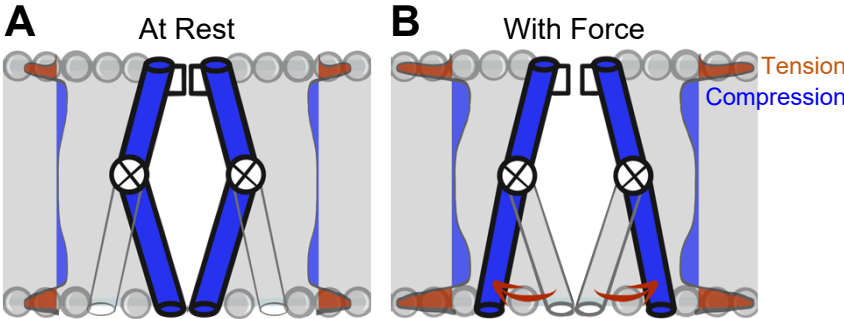

Figure 6
